# Supplementary material for: Dibenzoazepine hydrazine is a building block for N-alkene hybrid ligands: exploratory syntheses of complexes of Cu, Fe, and Li
Source: Royal Society of Chemistry journal article supplement (doi:10.1039/d4dt00749b), 2024-01-01
Supplement: d4dt00749b1.pdf [file d4dt00749b1.pdf]

## Supporting Information

# Dibenzoazepine hydrazine is a building block for N-alkene hybrid ligands: Exploratory syntheses of complexes of Cu, Fe, and Li

Alexander Grasruck<sup>1</sup>, Kristina Schall, Frank W. Heinemann<sup>1</sup>, Jens Langer<sup>2</sup>, Alberto Herrera<sup>1</sup>, Sybille Frieß<sup>1</sup>, Günter Schmid<sup>3</sup>, Romano Dorta<sup>1\*</sup>

<sup>1</sup>*Department of Chemistry and Pharmacy, Chair of Inorganic and General Chemistry, Friedrich Alexander Universität Erlangen–Nürnberg, Egerlandstraße 1, 91058 Erlangen, Germany*

<sup>2</sup>*Department of Chemistry and Pharmacy, Chair of Inorganic and General Chemistry and Chair of Inorganic and Organometallic Chemistry, Friedrich Alexander Universität Erlangen–Nürnberg, Egerlandstraße 1, 91058 Erlangen, Germany*

<sup>3</sup>*Siemens Energy Global GmbH & Co. KG, New Energy Business – Technology & Products Freyeslebenstraße 1, 91058 Erlangen, Germany*

## 1. X-ray crystal structure determinations

Suitable single crystals of all investigated compounds were embedded in protective perfluoropolyalkyether oil (viscosity 1800 cSt; ABCR GmbH) on a microscope slide and a single specimen was selected and subsequently transferred to the cold nitrogen gas stream of the diffractometer. Intensity data of **7**, **13**, **14**, and **19** was collected at 100 K on a Bruker Kappa  $I\mu S$  Duo diffractometer using  $\text{MoK}_\alpha$  radiation ( $\lambda = 0.71073 \text{ \AA}$ ) and QUAZAR focusing Montel optics, while intensity data for **10** was collected at 100 K on a Bruker Smart diffractometer using  $\text{MoK}_\alpha$  radiation ( $\lambda = 0.71073 \text{ \AA}$ , curved graphite monochromator). The intensity data for **11**, **15**, **17**, and **18** was collected at 100 K on an Agilent SuperNova dual radiation diffractometer with microfocus X-ray sources and mirror optics using either  $\text{MoK}_\alpha$  radiation ( $\lambda = 0.71073 \text{ \AA}$ ; compounds **11** and **18**) or  $\text{CuK}_\alpha$  radiation ( $\lambda = 1.54184 \text{ \AA}$ ; compounds **15** and **17**). The measured data were processed with the CrysAlisPro software package<sup>1</sup> for **11**, **15**, **17**, and **18**, while for **7**, **10**, **13**, **14**, and **19** the APEX2<sup>25</sup> software package was used. Data were corrected for Lorentz and polarization effects, and an empirical absorption correction using spherical harmonics as well as a numerical absorption correction based on gaussian integration over a multifaceted crystal model were applied. Using Olex2,<sup>3</sup> the structures were solved by dual-space or direct methods (SHELXT)<sup>4</sup> and refined by full-matrix least-squares procedures on  $F^2$  using SHELXL.<sup>5</sup> Most non-hydrogen atoms were refined with anisotropic displacement parameters. Most H-atoms were placed in geometrically calculated positions and refined by using a riding model where each H-atom was assigned a fixed isotropic displacement parameter with a value equal to  $1.2U_{\text{eq}}$  (CH or  $\text{CH}_2$ ) or  $1.5U_{\text{eq}}$  ( $\text{CH}_3$ ) of its parent C-atom. Compound **7** crystallized with two symmetrically independent molecules in its asymmetric unit. Compound **10** crystallized with two symmetrically independent halves of the molecule, each being located on a crystallographic inversion centre.

The crystal of **11** was a non-merohedral twin. The fractional contributions of the two twin domains were refined to 0.8795(8) and 0.1205(8). The asymmetric unit contained four independent molecules.

Crystals of compound **13** were of rather poor quality and underwent rapid weathering. One of the coordinated tetrahydrofuran molecules was disordered. Two alternative orientations were refined and resulted in site occupancies of 43.1(8) and 56.9(8) for the atoms O3, C26 – C29 and O3A, C26A – C29A, respectively. Similarity restraints were applied in the refinement of the anisotropic displacement parameters of the disordered atoms.

The structure of compound **17** suffered from substantial disorder, caused by the presence of different conformers. The major conformer, which occupied 78% of the lattice sites, showed a transoid arrangement of the dibenzoazepine moieties, while in both minor conformers (occupancy: 12% and 10%,

respectively) those groups had a cisoid arrangement. Due to the rather low amount of cis isomer present, its atoms were refined with isotropic displacement parameters in places where they not overlap perfectly with the major isomer. Additionally, similarity restraints (SADI, SIMU) were applied and the phenylene moieties in these minor conformers were refined as perfect hexagons (AFIX 66). In parts, where a perfect overlap between the conformers was observed, the atoms were duplicated by use of EXYZ/EADP and connected with the other atoms of the respective conformer in order to give the viewer a better understanding of the connectivity pattern.

In case of compound **18**, the hydrogen atoms of the olefinic moieties were placed in the positions indicated by a difference electron density map and their positions were refined together with an isotropic displacement parameter.

The crystal structure data has been deposited with the Cambridge Crystallographic Data Centre. CCDC 2338469 - 2338477 contain the supplementary crystallographic data for the complexes. This data can be obtained free of charge from The Cambridge Crystallographic Data Centre via [www.ccdc.cam.ac.uk/data\\_request/cif](http://www.ccdc.cam.ac.uk/data_request/cif).

Crystallographic and refinement data are summarized in Table **S1**.

**Table S1.** Crystallographic data, data collection, and refinement details for **7**, **10**, and **11**.

| Compound                                                     | <b>7</b>                                                                       | <b>10</b>                                                       | <b>11</b>                                                       |
|--------------------------------------------------------------|--------------------------------------------------------------------------------|-----------------------------------------------------------------|-----------------------------------------------------------------|
| CCDC number                                                  | 2338469                                                                        | 2338470                                                         | 2338471                                                         |
| Identification code                                          | RD1721                                                                         | RD1619                                                          | rodo180531b_twin1_hklf5                                         |
| Empirical formula                                            | C <sub>51</sub> H <sub>57</sub> Li <sub>3</sub> N <sub>6</sub> Si <sub>3</sub> | C <sub>30</sub> H <sub>22</sub> N <sub>4</sub>                  | C <sub>26</sub> H <sub>16</sub> N <sub>2</sub> O                |
| Formula weight                                               | 859.11                                                                         | 438.51                                                          | 372.41                                                          |
| Temperature/K                                                | 100(2)                                                                         | 100(2)                                                          | 99.9(4)                                                         |
| Crystal system                                               | monoclinic                                                                     | triclinic                                                       | triclinic                                                       |
| Space group                                                  | <i>P</i> 2 <sub>1</sub>                                                        | <i>P</i> -1                                                     | <i>P</i> -1                                                     |
| <i>a</i> /Å                                                  | 11.5186(9)                                                                     | 10.1577(4)                                                      | 10.4448(3)                                                      |
| <i>b</i> /Å                                                  | 19.8427(16)                                                                    | 11.1480(4)                                                      | 16.6554(5)                                                      |
| <i>c</i> /Å                                                  | 21.2591(17)                                                                    | 11.4751(4)                                                      | 21.5436(6)                                                      |
| $\alpha$ /°                                                  | 90                                                                             | 100.479(2)                                                      | 92.468(2)                                                       |
| $\beta$ /°                                                   | 100.794(2)                                                                     | 113.912(2)                                                      | 92.260(2)                                                       |
| $\gamma$ /°                                                  | 90                                                                             | 98.710(2)                                                       | 90.330(2)                                                       |
| Volume/Å <sup>3</sup>                                        | 4773.0(7)                                                                      | 1130.84(7)                                                      | 3741.28(19)                                                     |
| <i>Z</i>                                                     | 4                                                                              | 2                                                               | 8                                                               |
| $\rho_{\text{calc}}$ /g/cm <sup>3</sup>                      | 1.196                                                                          | 1.288                                                           | 1.322                                                           |
| $\mu$ /mm <sup>-1</sup>                                      | 0.140                                                                          | 0.077                                                           | 0.081                                                           |
| <i>F</i> (000)                                               | 1824                                                                           | 460                                                             | 1552                                                            |
| Crystal size/mm <sup>3</sup>                                 | 0.28 × 0.21 × 0.07                                                             | 0.28 × 0.20 × 0.09                                              | 0.52 × 0.37 × 0.356                                             |
| Radiation                                                    | MoK $\alpha$ ( $\lambda$ = 0.71073)                                            | MoK $\alpha$ ( $\lambda$ = 0.71073)                             | MoK $\alpha$ ( $\lambda$ = 0.71073)                             |
| 2 $\theta$ range for data collection/°                       | 1.95 to 55.85                                                                  | 3.83 to 57.42                                                   | 4.27 to 59.29                                                   |
| Index ranges                                                 | -15 ≤ <i>h</i> ≤ 15, -26 ≤ <i>k</i> ≤ 26, -27 ≤ <i>l</i> ≤ 28                  | -13 ≤ <i>h</i> ≤ 13, -15 ≤ <i>k</i> ≤ 15, -15 ≤ <i>l</i> ≤ 15   | -13 ≤ <i>h</i> ≤ 13, -23 ≤ <i>k</i> ≤ 23, -29 ≤ <i>l</i> ≤ 29   |
| Reflections collected                                        | 140713                                                                         | 60824                                                           | 21081                                                           |
| Independent reflections                                      | 22777 [ <i>R</i> <sub>int</sub> = 0.086]                                       | 5741 [ <i>R</i> <sub>int</sub> = 0.026]                         | 21081 [ <i>R</i> <sub>int</sub> = 0.078]                        |
| Data/restraints/parameters                                   | 22777/1/1153                                                                   | 5741/0/307                                                      | 21081/0/1046                                                    |
| Goodness-of-fit on <i>F</i> <sup>2</sup>                     | 1.030                                                                          | 1.033                                                           | 1.043                                                           |
| Final <i>R</i> indexes [ <i>I</i> ≥ 2 $\sigma$ ( <i>I</i> )] | <i>R</i> <sub>1</sub> = 0.0477, <i>wR</i> <sub>2</sub> = 0.0931                | <i>R</i> <sub>1</sub> = 0.0387, <i>wR</i> <sub>2</sub> = 0.0907 | <i>R</i> <sub>1</sub> = 0.0537, <i>wR</i> <sub>2</sub> = 0.1467 |
| Final <i>R</i> indexes [all data]                            | <i>R</i> <sub>1</sub> = 0.0694, <i>wR</i> <sub>2</sub> = 0.1007                | <i>R</i> <sub>1</sub> = 0.0508, <i>wR</i> <sub>2</sub> = 0.0974 | <i>R</i> <sub>1</sub> = 0.0751, <i>wR</i> <sub>2</sub> = 0.1520 |
| Largest diff. peak/hole / e Å <sup>-3</sup>                  | 0.41/-0.49                                                                     | 0.31/-0.21                                                      | 0.27/-0.29                                                      |
| Absolute structure parameter <sup>6</sup>                    | -0.04(3)                                                                       | -                                                               | -                                                               |

**Table S2.** Crystallographic data, data collection, and refinement details for **13**, **14**, and **15**.

| Compound                                                      | <b>13</b>                                                       | <b>14</b>                                                       | <b>15</b>                                                       |
|---------------------------------------------------------------|-----------------------------------------------------------------|-----------------------------------------------------------------|-----------------------------------------------------------------|
| CCDC number                                                   | 2338472                                                         | 2338473                                                         | 2338474                                                         |
| Identification code                                           | RD1905                                                          | RD1728                                                          | rodo180915a                                                     |
| Empirical formula                                             | C <sub>29</sub> H <sub>39</sub> LiN <sub>2</sub> O <sub>3</sub> | C <sub>40</sub> H <sub>30</sub> N <sub>3</sub> P                | C <sub>38</sub> H <sub>34</sub> CuN <sub>4</sub> O <sub>2</sub> |
| Formula weight                                                | 470.56                                                          | 583.64                                                          | 642.23                                                          |
| Temperature/K                                                 | 100(2)                                                          | 100(2)                                                          | 100.0(1)                                                        |
| Crystal system                                                | monoclinic                                                      | triclinic                                                       | orthorhombic                                                    |
| Space group                                                   | <i>P</i> 2 <sub>1</sub> / <i>c</i>                              | <i>P</i> -1                                                     | <i>Fdd</i> 2                                                    |
| <i>a</i> /Å                                                   | 8.8126(17)                                                      | 8.7777(9)                                                       | 10.66630(10)                                                    |
| <i>b</i> /Å                                                   | 16.863(3)                                                       | 10.3537(10)                                                     | 39.1923(5)                                                      |
| <i>c</i> /Å                                                   | 17.707(4)                                                       | 16.8562(17)                                                     | 15.0354(2)                                                      |
| $\alpha$ /°                                                   | 90                                                              | 82.729(2)                                                       | 90                                                              |
| $\beta$ /°                                                    | 93.616(7)                                                       | 80.357(2)                                                       | 90                                                              |
| $\gamma$ /°                                                   | 90                                                              | 87.825(2)                                                       | 90                                                              |
| Volume/Å <sup>3</sup>                                         | 2626.2(9)                                                       | 1497.9(3)                                                       | 6285.35(13)                                                     |
| <i>Z</i>                                                      | 4                                                               | 2                                                               | 8                                                               |
| $\rho_{\text{calc}}$ /g/cm <sup>3</sup>                       | 1.190                                                           | 1.294                                                           | 1.357                                                           |
| $\mu$ /mm <sup>-1</sup>                                       | 0.076                                                           | 0.127                                                           | 1.299                                                           |
| <i>F</i> (000)                                                | 1016                                                            | 612                                                             | 2680.0                                                          |
| Crystal size/mm <sup>3</sup>                                  | 0.19 × 0.15 × 0.12                                              | 0.15 × 0.12 × 0.045                                             | 0.278 × 0.24 × 0.105                                            |
| Radiation                                                     | MoK $\alpha$ ( $\lambda$ = 0.71073)                             | MoK $\alpha$ ( $\lambda$ = 0.71073)                             | CuK $\alpha$ ( $\lambda$ = 1.54184)                             |
| 2 $\theta$ range for data collection/°                        | 4.61 to 54.18                                                   | 2.47 to 57.50                                                   | 9.02 to 147.27                                                  |
| Index ranges                                                  | -11 ≤ <i>h</i> ≤ 11, -21 ≤ <i>k</i> ≤ 21, -22 ≤ <i>l</i> ≤ 22   | -11 ≤ <i>h</i> ≤ 11, -13 ≤ <i>k</i> ≤ 13, -22 ≤ <i>l</i> ≤ 22   | -13 ≤ <i>h</i> ≤ 13, -48 ≤ <i>k</i> ≤ 48, -18 ≤ <i>l</i> ≤ 18   |
| Reflections collected                                         | 84572                                                           | 72973                                                           | 23807                                                           |
| Independent reflections                                       | 5790 [ <i>R</i> <sub>int</sub> = 0.074]                         | 7731 [ <i>R</i> <sub>int</sub> = 0.050]                         | 3152 [ <i>R</i> <sub>int</sub> = 0.025]                         |
| Data/restraints/parameters                                    | 5790/150/363                                                    | 7731/0/397                                                      | 3152/1/206                                                      |
| Goodness-of-fit on <i>F</i> <sup>2</sup>                      | 1.048                                                           | 1.076                                                           | 1.079                                                           |
| Final <i>R</i> indexes [ <i>I</i> >= 2 $\sigma$ ( <i>I</i> )] | <i>R</i> <sub>1</sub> = 0.0615, <i>wR</i> <sub>2</sub> = 0.1472 | <i>R</i> <sub>1</sub> = 0.0439, <i>wR</i> <sub>2</sub> = 0.0967 | <i>R</i> <sub>1</sub> = 0.0224, <i>wR</i> <sub>2</sub> = 0.0599 |
| Final <i>R</i> indexes [all data]                             | <i>R</i> <sub>1</sub> = 0.0804, <i>wR</i> <sub>2</sub> = 0.1595 | <i>R</i> <sub>1</sub> = 0.0633, <i>wR</i> <sub>2</sub> = 0.1069 | <i>R</i> <sub>1</sub> = 0.0224, <i>wR</i> <sub>2</sub> = 0.0599 |
| Largest diff. peak/hole / e Å <sup>-3</sup>                   | 0.62/-0.34                                                      | 0.54/-0.39                                                      | 0.19/-0.37                                                      |
| Absolute structure parameter <sup>6</sup>                     | -                                                               | -                                                               | -0.016(6)                                                       |

**Table S3.** Crystallographic data, data collection, and refinement details for **17**, **18**, and **19**.

|                                                     |                                                                  |                                                                                                                             |                                                                                  |
|-----------------------------------------------------|------------------------------------------------------------------|-----------------------------------------------------------------------------------------------------------------------------|----------------------------------------------------------------------------------|
| Compound                                            | <b>17</b> ·C <sub>6</sub> H <sub>6</sub>                         | <b>18</b> ·2CH <sub>2</sub> Cl <sub>2</sub>                                                                                 | <b>19</b>                                                                        |
| CCDC number                                         | 2338475                                                          | 2338476                                                                                                                     | 2338477                                                                          |
| Identification code                                 | rodo180421a                                                      | rodo180531a                                                                                                                 | RD1904                                                                           |
| Empirical formula                                   | C <sub>36</sub> H <sub>28</sub> Cl <sub>2</sub> FeN <sub>4</sub> | C <sub>56</sub> H <sub>36</sub> Cl <sub>4</sub> Cu <sub>2</sub> F <sub>6</sub> N <sub>4</sub> O <sub>8</sub> S <sub>2</sub> | C <sub>35</sub> H <sub>32</sub> CuF <sub>3</sub> N <sub>4</sub> O <sub>3</sub> S |
| Formula weight                                      | 643.37                                                           | 1339.89                                                                                                                     | 709.24                                                                           |
| Temperature/K                                       | 100.0(2)                                                         | 100(1)                                                                                                                      | 100(2)                                                                           |
| Crystal system                                      | monoclinic                                                       | monoclinic                                                                                                                  | orthorhombic                                                                     |
| Space group                                         | <i>P</i> 2 <sub>1</sub> / <i>n</i>                               | <i>P</i> 2 <sub>1</sub> / <i>c</i>                                                                                          | <i>P</i> 2 <sub>1</sub> 2 <sub>1</sub> 2 <sub>1</sub>                            |
| <i>a</i> /Å                                         | 12.8273(2)                                                       | 16.9485(3)                                                                                                                  | 12.4220(6)                                                                       |
| <i>b</i> /Å                                         | 12.01604(12)                                                     | 17.6987(3)                                                                                                                  | 13.8004(9)                                                                       |
| <i>c</i> /Å                                         | 20.6789(3)                                                       | 17.5363(3)                                                                                                                  | 18.5331(9)                                                                       |
| <i>α</i> /°                                         | 90                                                               | 90                                                                                                                          | 90                                                                               |
| <i>β</i> /°                                         | 107.3288(15)                                                     | 96.3972(16)                                                                                                                 | 90                                                                               |
| <i>γ</i> /°                                         | 90                                                               | 90                                                                                                                          | 90                                                                               |
| Volume/Å <sup>3</sup>                               | 3042.63(8)                                                       | 5227.53(16)                                                                                                                 | 3177.1(3)                                                                        |
| <i>Z</i>                                            | 4                                                                | 4                                                                                                                           | 4                                                                                |
| <i>ρ</i> <sub>calc</sub> /g/cm <sup>3</sup>         | 1.405                                                            | 1.702                                                                                                                       | 1.483                                                                            |
| <i>μ</i> /mm <sup>-1</sup>                          | 5.841                                                            | 1.182                                                                                                                       | 0.814                                                                            |
| <i>F</i> (000)                                      | 1328.0                                                           | 2704.0                                                                                                                      | 1464                                                                             |
| Crystal size/mm <sup>3</sup>                        | 0.23 × 0.22 × 0.09                                               | 0.48 × 0.31 × 0.19                                                                                                          | 0.23 × 0.14 × 0.07                                                               |
| Radiation                                           | CuKα (λ = 1.54184)                                               | MoKα (λ = 0.71073)                                                                                                          | MoKα (λ = 0.71073)                                                               |
| 2θ range for data collection/°                      | 7.27 to 146.68                                                   | 4.67 to 59.68                                                                                                               | 3.68 to 59.22                                                                    |
| Index ranges                                        | -15 ≤ <i>h</i> ≤ 15, -14 ≤ <i>k</i> ≤ 14, -25 ≤ <i>l</i> ≤ 25    | -23 ≤ <i>h</i> ≤ 23, -24 ≤ <i>k</i> ≤ 24, -22 ≤ <i>l</i> ≤ 24                                                               | -17 ≤ <i>h</i> ≤ 17, -19 ≤ <i>k</i> ≤ 18, -25 ≤ <i>l</i> ≤ 25                    |
| Reflections collected                               | 23355                                                            | 49209                                                                                                                       | 120226                                                                           |
| Independent reflections                             | 5980 [ <i>R</i> <sub>int</sub> = 0.038]                          | 12941 [ <i>R</i> <sub>int</sub> = 0.030]                                                                                    | 8915 [ <i>R</i> <sub>int</sub> = 0.056]                                          |
| Data/restraints/parameters                          | 5980/200/503                                                     | 12941/0/755                                                                                                                 | 8915/0/428                                                                       |
| Goodness-of-fit on <i>F</i> <sup>2</sup>            | 1.057                                                            | 1.032                                                                                                                       | 1.076                                                                            |
| Final <i>R</i> indexes [ <i>I</i> ≥ 2σ( <i>I</i> )] | <i>R</i> <sub>1</sub> = 0.0396, <i>wR</i> <sub>2</sub> = 0.1030  | <i>R</i> <sub>1</sub> = 0.0327, <i>wR</i> <sub>2</sub> = 0.0715                                                             | <i>R</i> <sub>1</sub> = 0.0266, <i>wR</i> <sub>2</sub> = 0.0592                  |
| Final <i>R</i> indexes [all data]                   | <i>R</i> <sub>1</sub> = 0.0415, <i>wR</i> <sub>2</sub> = 0.1047  | <i>R</i> <sub>1</sub> = 0.0449, <i>wR</i> <sub>2</sub> = 0.0771                                                             | <i>R</i> <sub>1</sub> = 0.0341, <i>wR</i> <sub>2</sub> = 0.0642                  |
| Largest diff. peak/hole / e Å <sup>-3</sup>         | 0.35/-0.37                                                       | 0.78/-0.67                                                                                                                  | 0.32/-0.37                                                                       |
| Absolute structure parameter <sup>6</sup>           | -                                                                | -                                                                                                                           | -0.003(3)                                                                        |

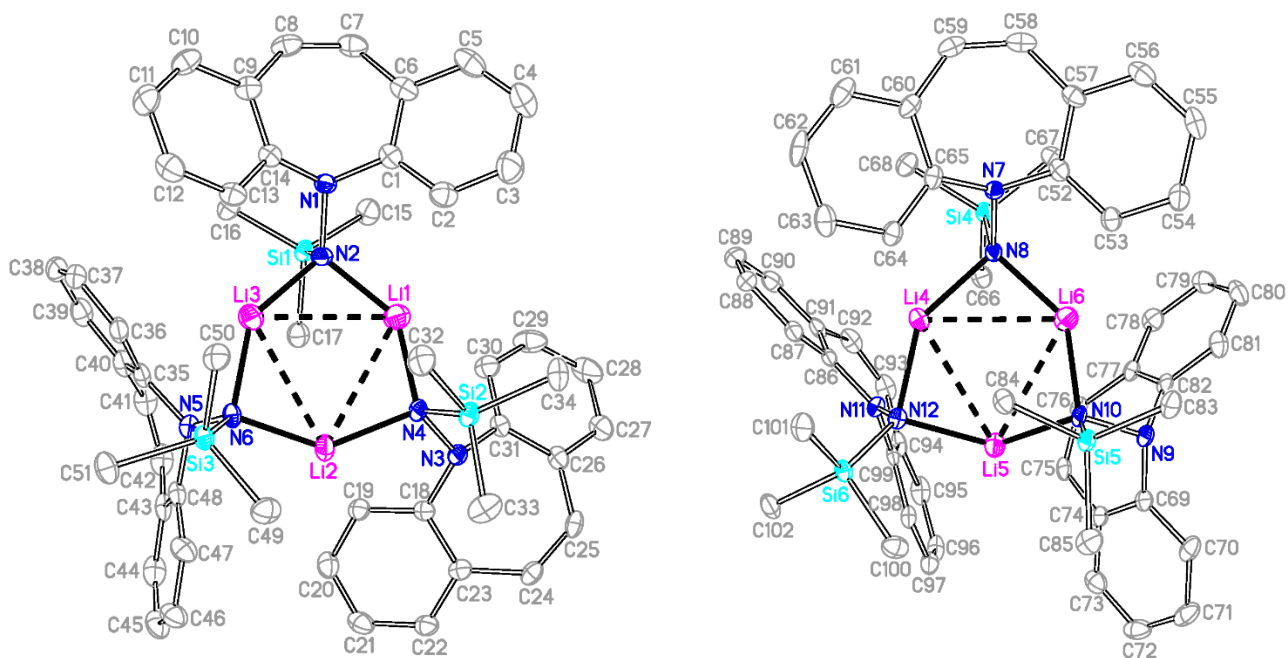

**Figure S1.** Thermal ellipsoid representation of the molecular structures of the two symmetrically independent molecules observed in the crystal structure of **7** with the applied numbering scheme (50 % probability ellipsoids, H atoms omitted for clarity).

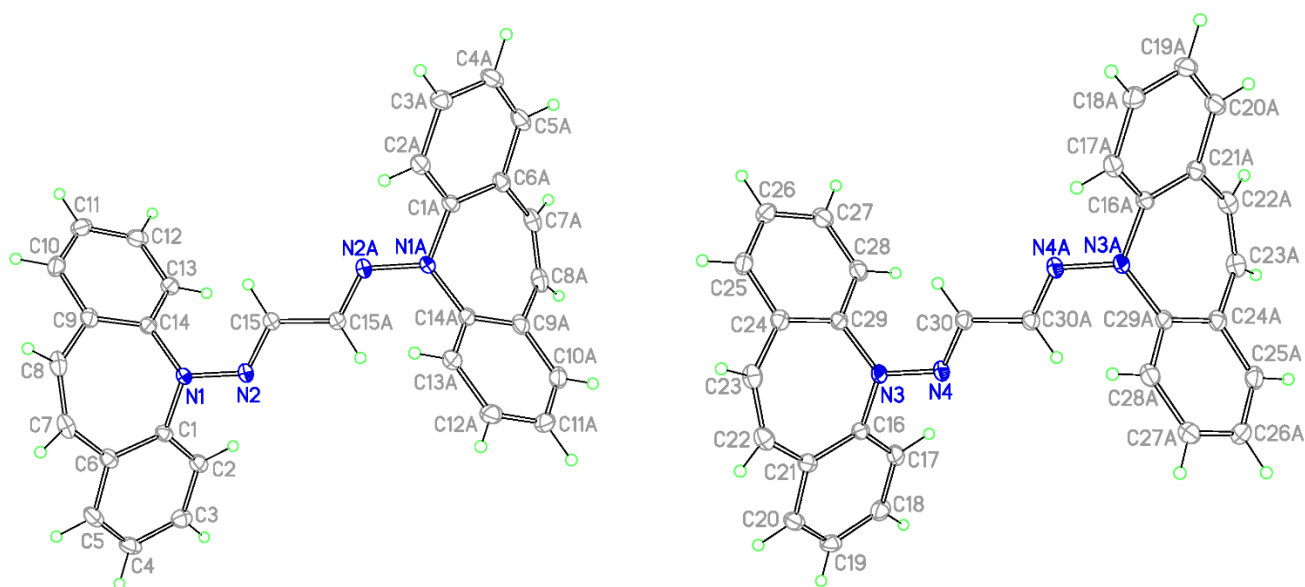

**Figure S2.** Thermal ellipsoid representation of the molecular structures of the two symmetrically independent molecules observed in the crystal structure of **10** with the applied numbering scheme (50 % probability ellipsoids, hydrogen atoms drawn as spheres of arbitrary size).

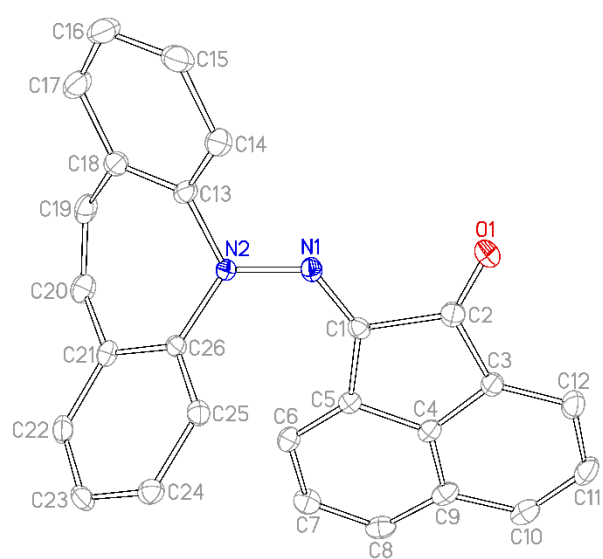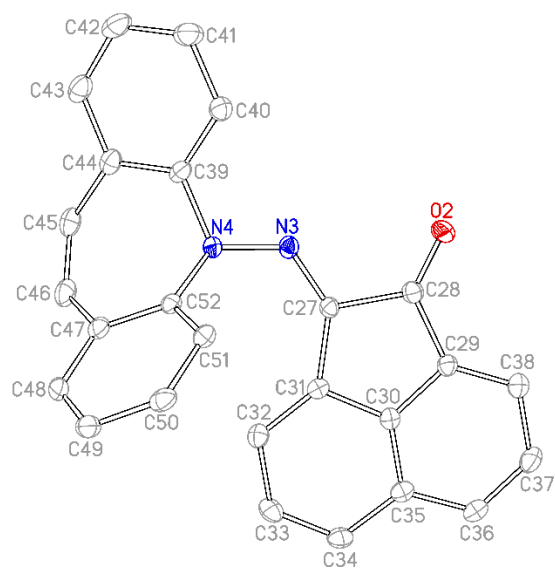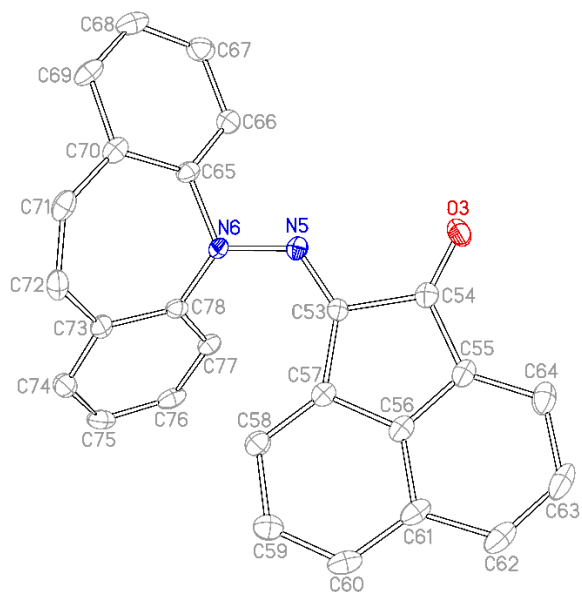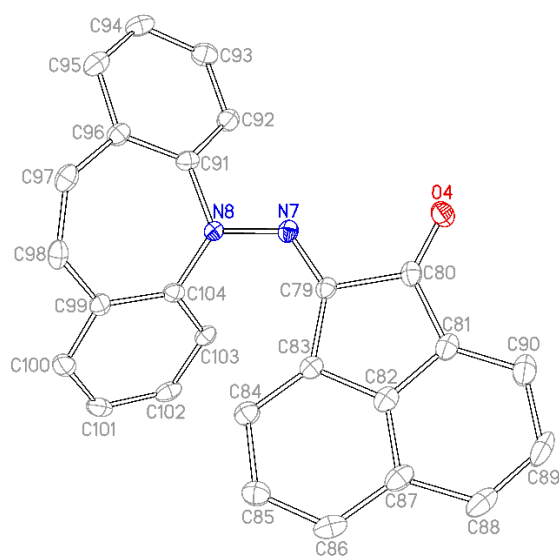

**Figure S3.** Thermal ellipsoid representation of the molecular structures of the four symmetrically independent molecules observed in the crystal structure of **11** with the applied numbering scheme (50 % probability ellipsoids, H atoms omitted for clarity).



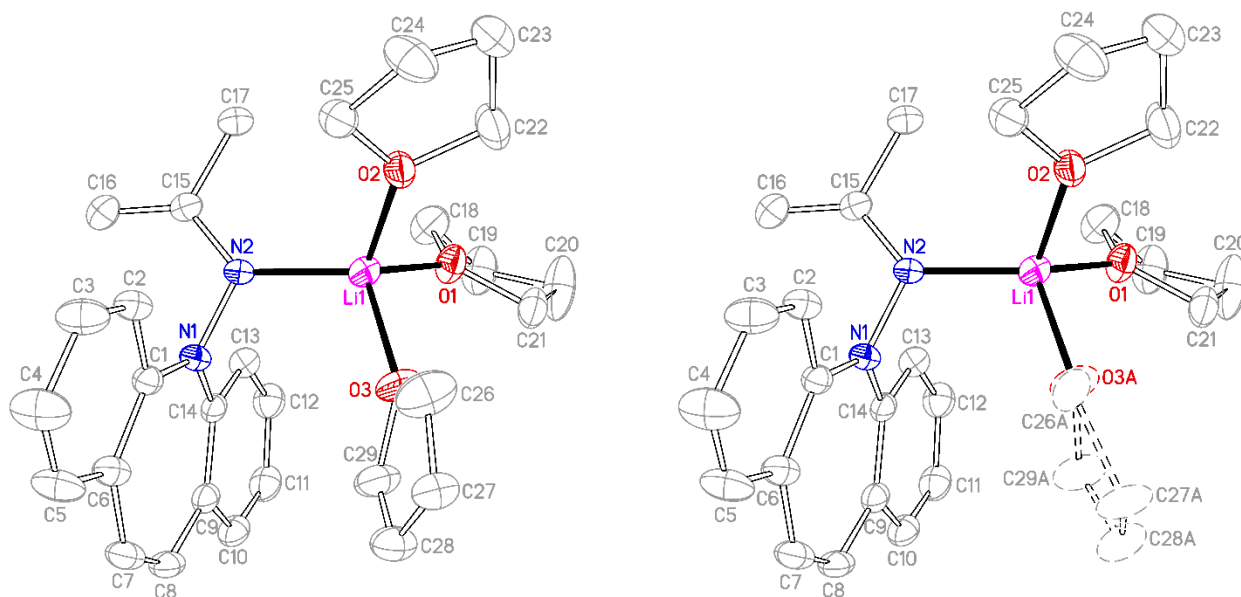

**Figure S4.** Thermal ellipsoid representation of the molecular structure of **13** with the applied numbering scheme; right picture highlights the alternative orientation of the disordered tetrahydrofuran drawn with dotted ellipsoids and lines (50 % probability ellipsoids, H atoms omitted for clarity).

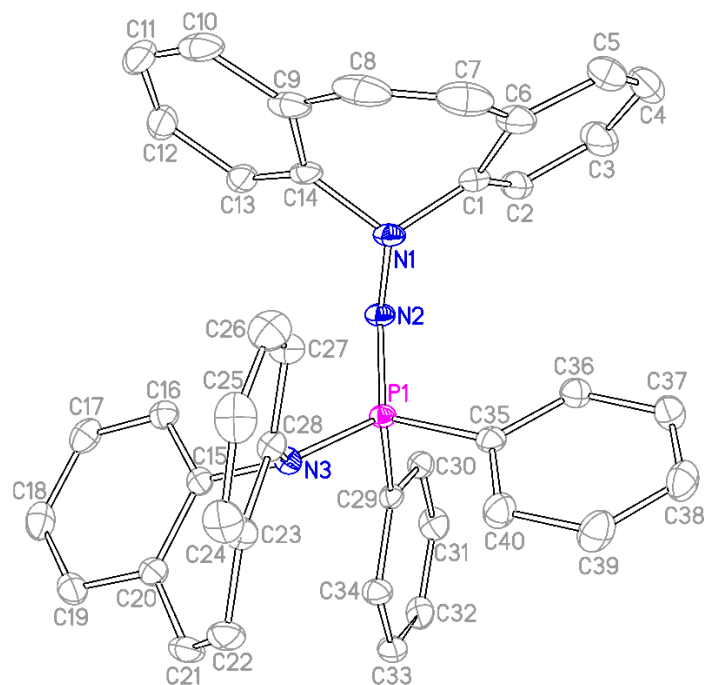

**Figure S5.** Thermal ellipsoid representation of the molecular structure of **14** with the applied numbering scheme (50 % probability ellipsoids, H atoms omitted for clarity).

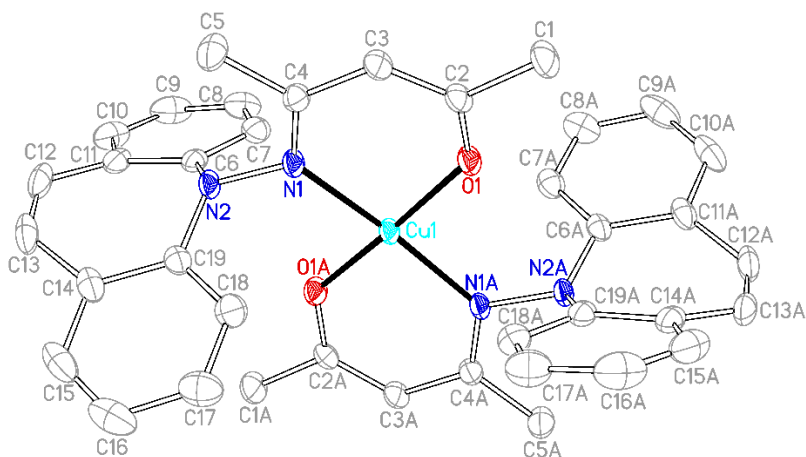

**Figure S6.** Thermal ellipsoid representation of the molecular structure of **15** with the applied numbering scheme (50 % probability ellipsoids, H atoms omitted for clarity).

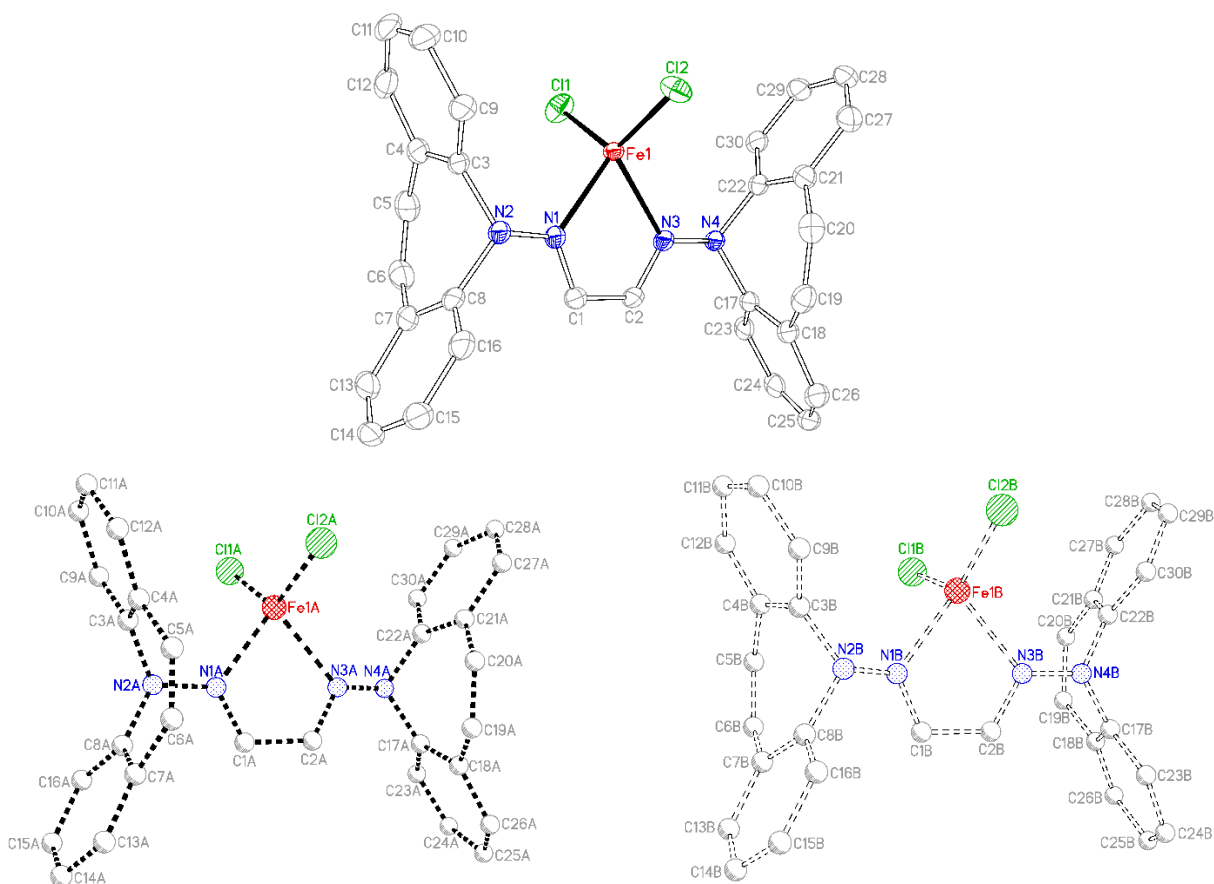

**Figure S7.** Top: Thermal ellipsoid representation of the molecular structure of **17** with the applied numbering scheme (50 % probability ellipsoids, H atoms, solvent molecules and disorder omitted for clarity);

Bottom: Ball and stick representations of the alternative orientations of the molecular structure observed in the crystal structure of **17** (hydrogen atoms omitted for clarity).

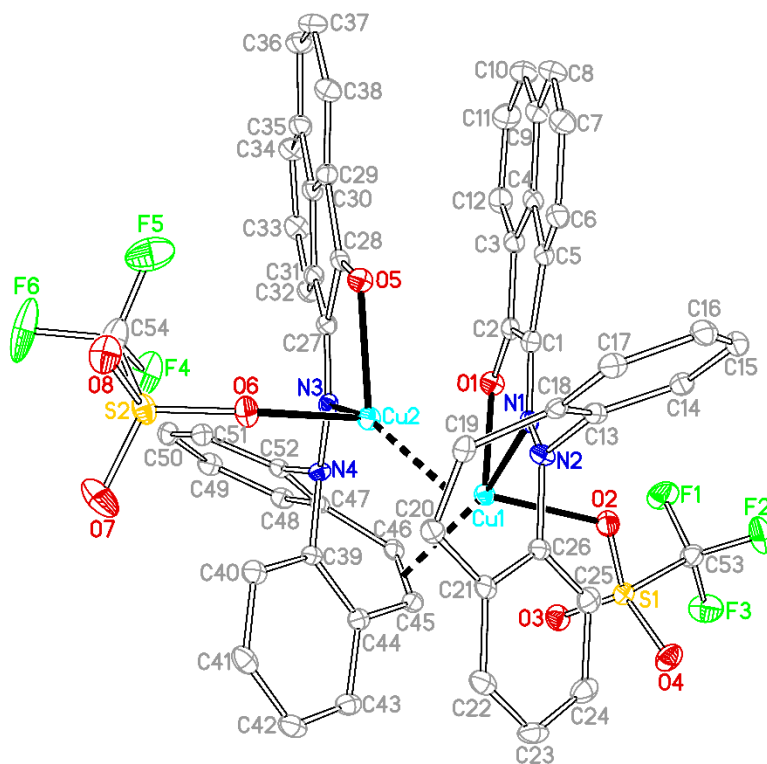

**Figure S8.** Top: Thermal ellipsoid representation of the molecular structure of **18** with the applied numbering scheme (50 % probability ellipsoids, H atoms and solvent molecules).

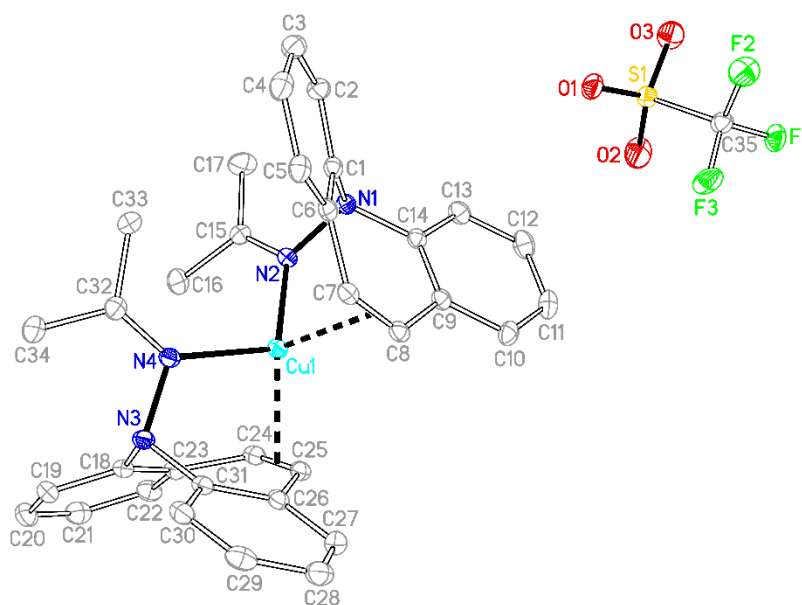

**Figure S9.** Top: Thermal ellipsoid representation of the molecular structure of the complex salt of **19** with the applied numbering scheme (50 % probability ellipsoids, H atoms and solvent molecules).

## 2. NMR Spectra

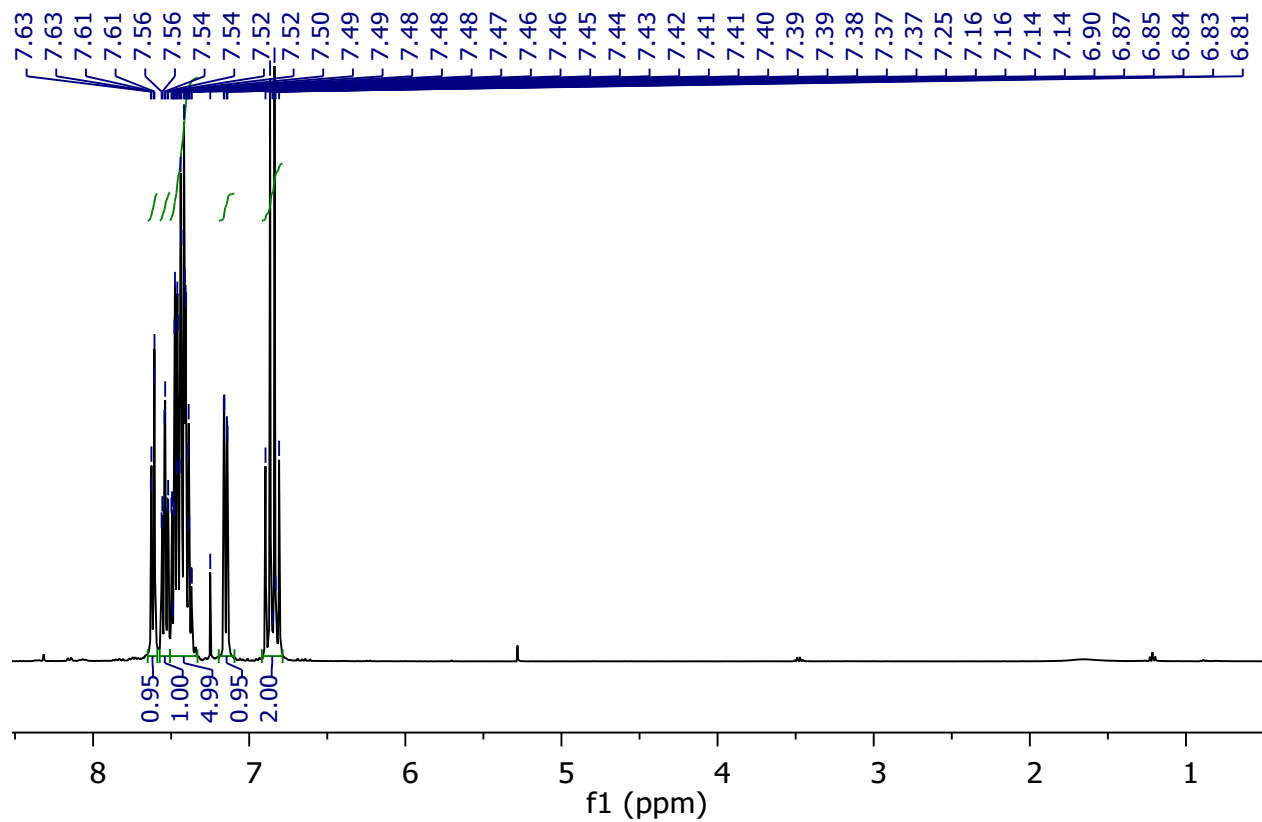

Figure S10: <sup>1</sup>H NMR of 1 in CDCl<sub>3</sub>

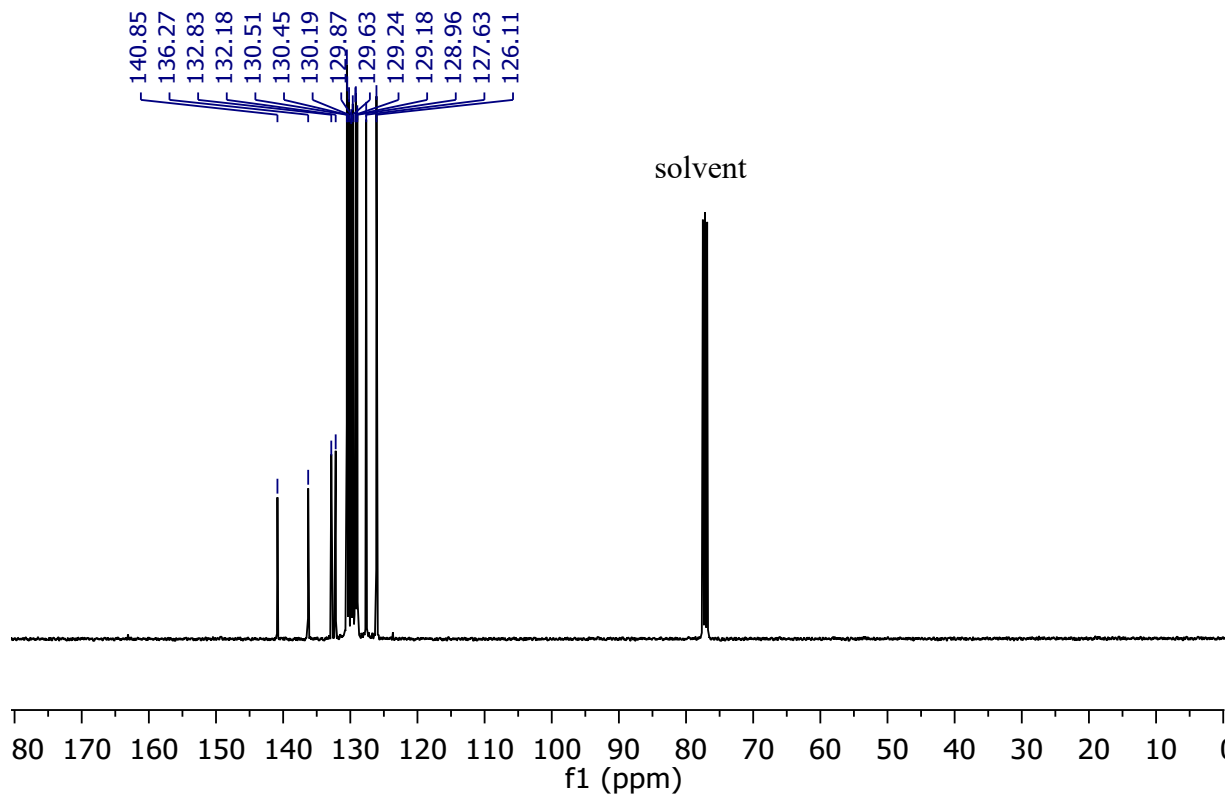

Figure S11: <sup>13</sup>C NMR of 1 in CDCl<sub>3</sub>

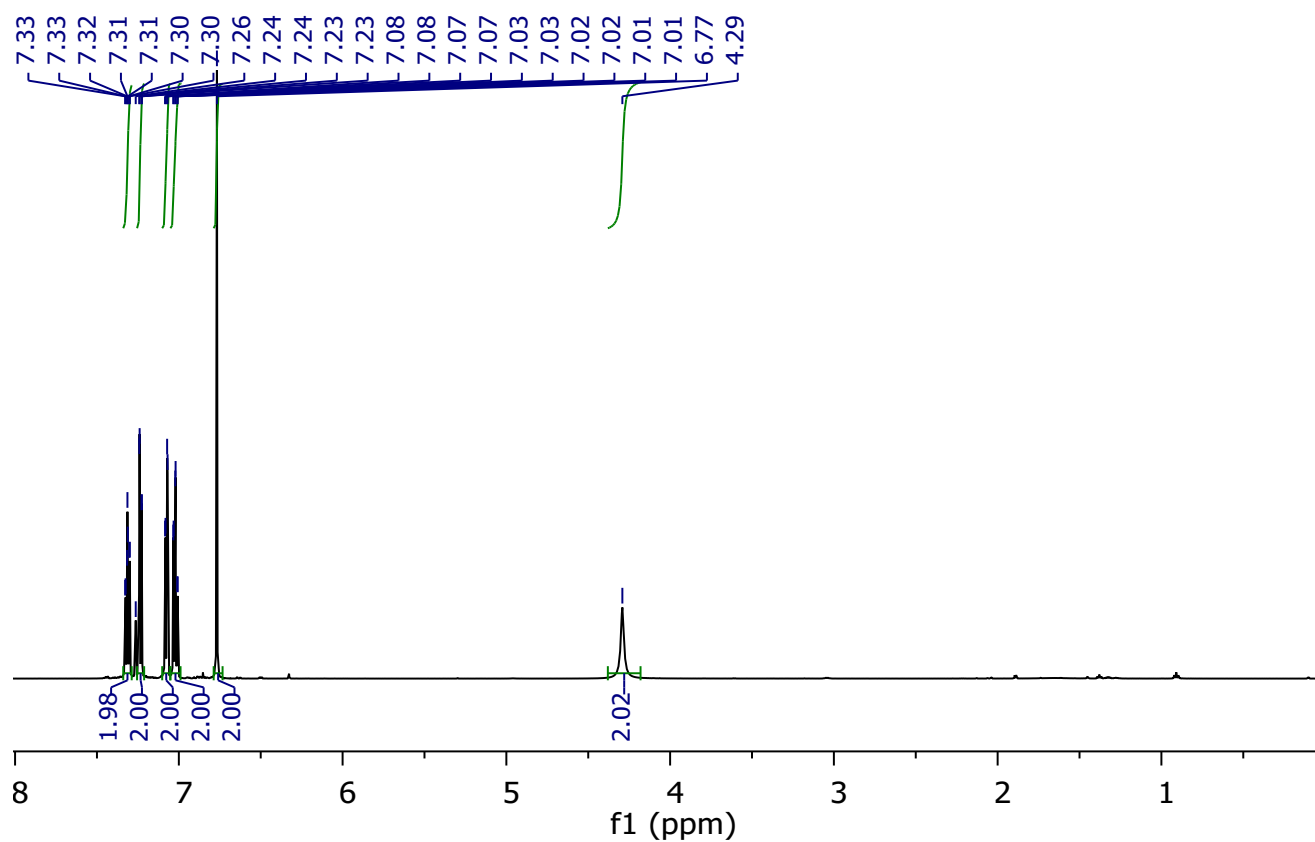

**Figure S12:** <sup>1</sup>H NMR of **2** in CDCl<sub>3</sub>

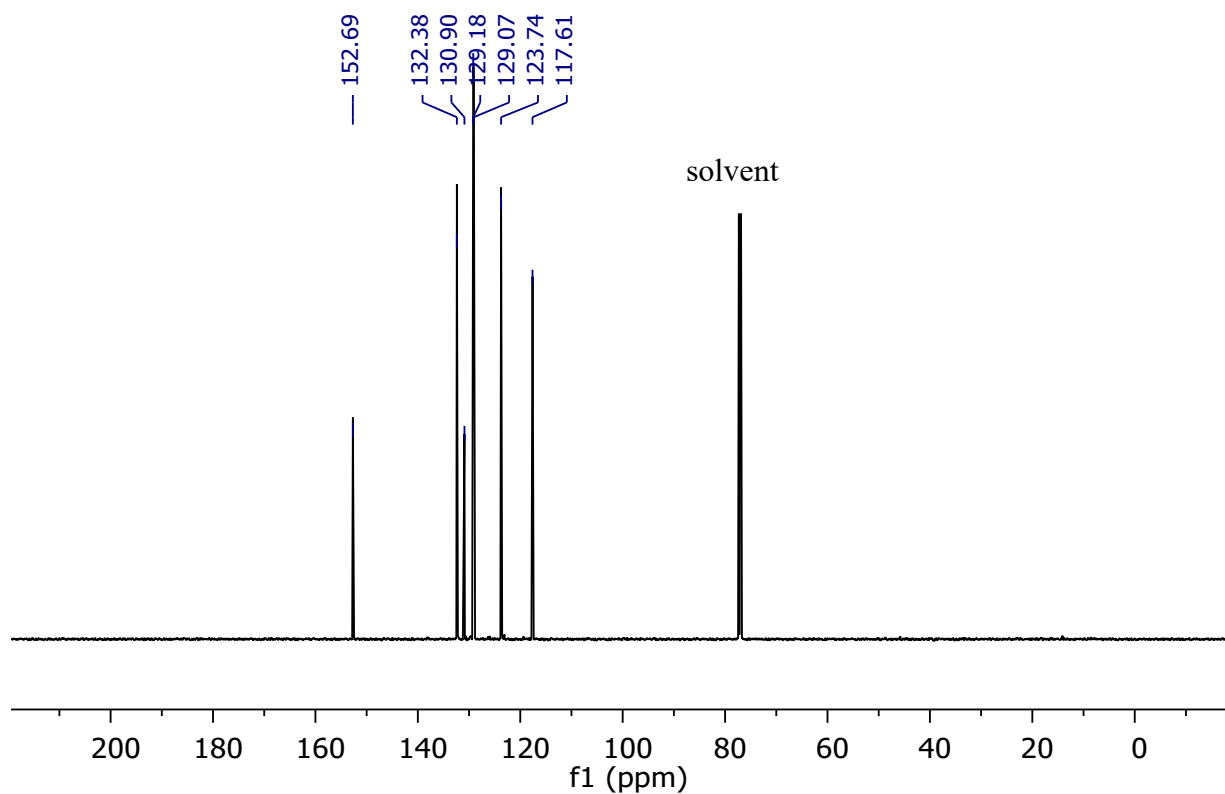

**Figure S13:** <sup>13</sup>C NMR of **2** in CDCl<sub>3</sub>

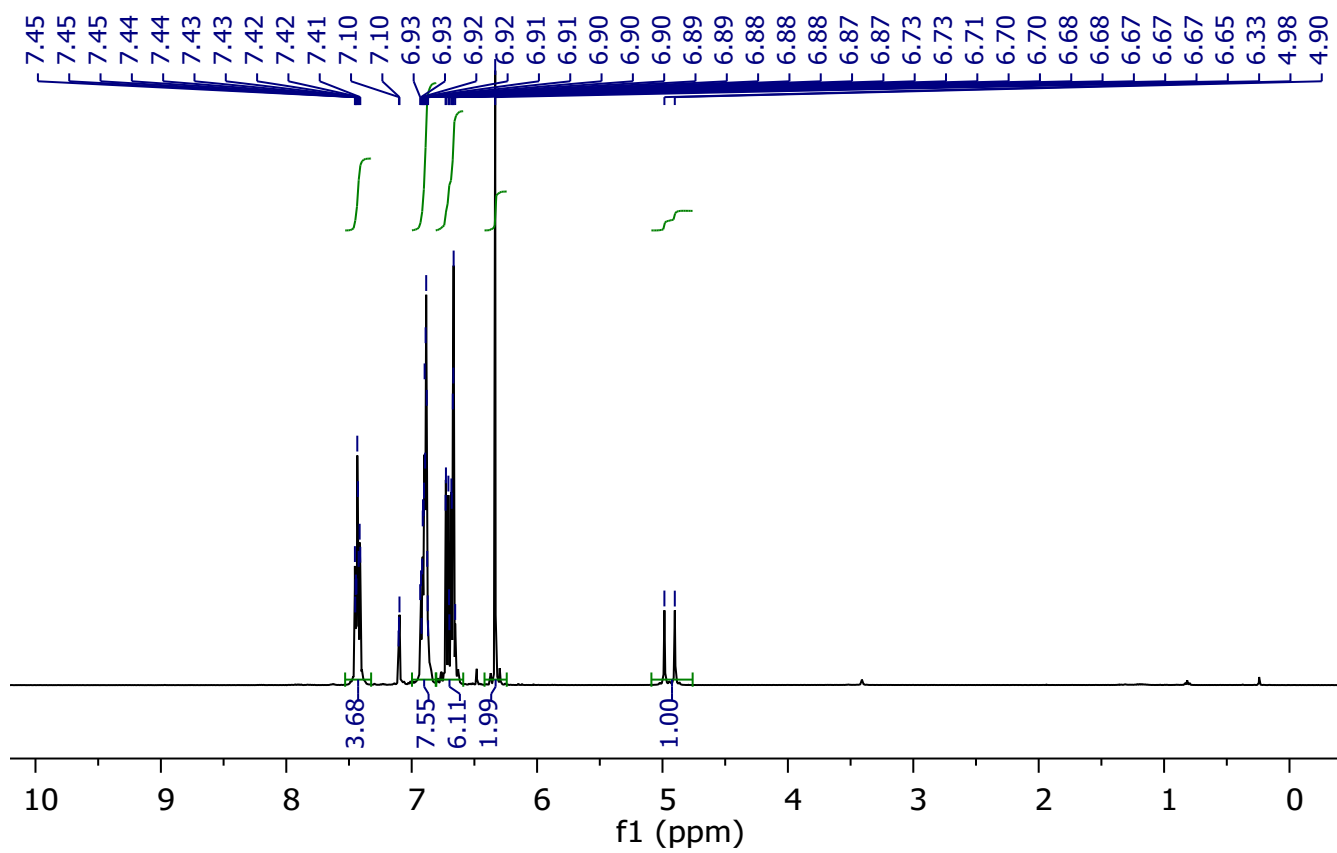

Figure S14:  $^1\text{H}$  NMR of **3** in  $\text{C}_6\text{D}_6$

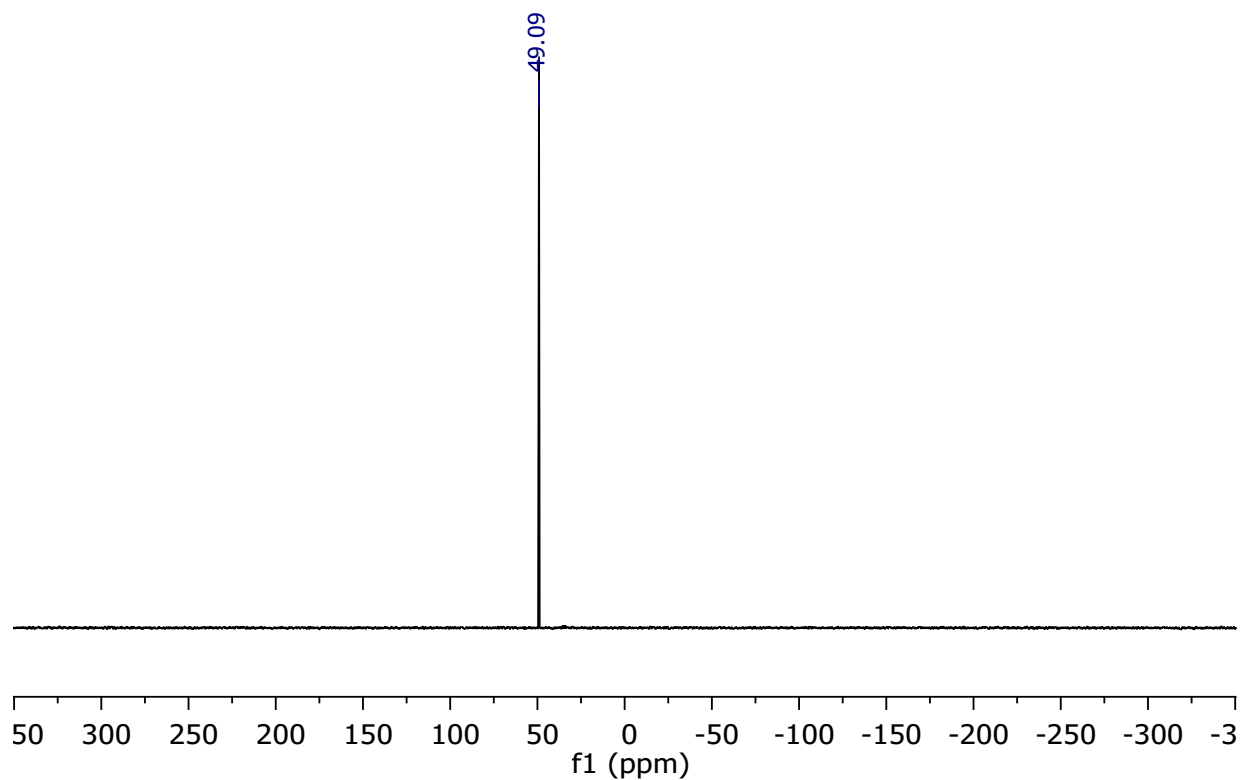

Figure S15:  $^{31}\text{P}$  NMR of **3** in  $\text{C}_6\text{D}_6$

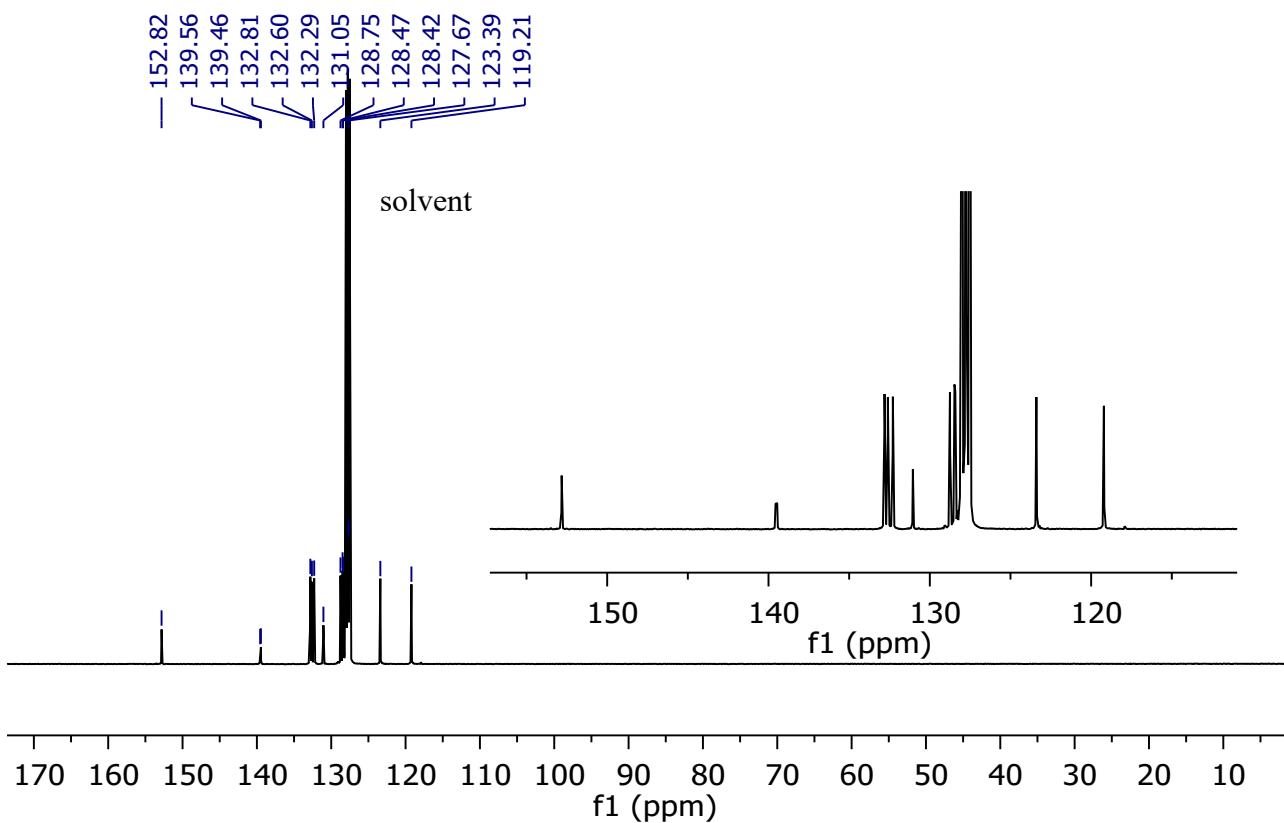

Figure S16:  $^{13}\text{C}$  NMR of **3** in  $\text{C}_6\text{D}_6$

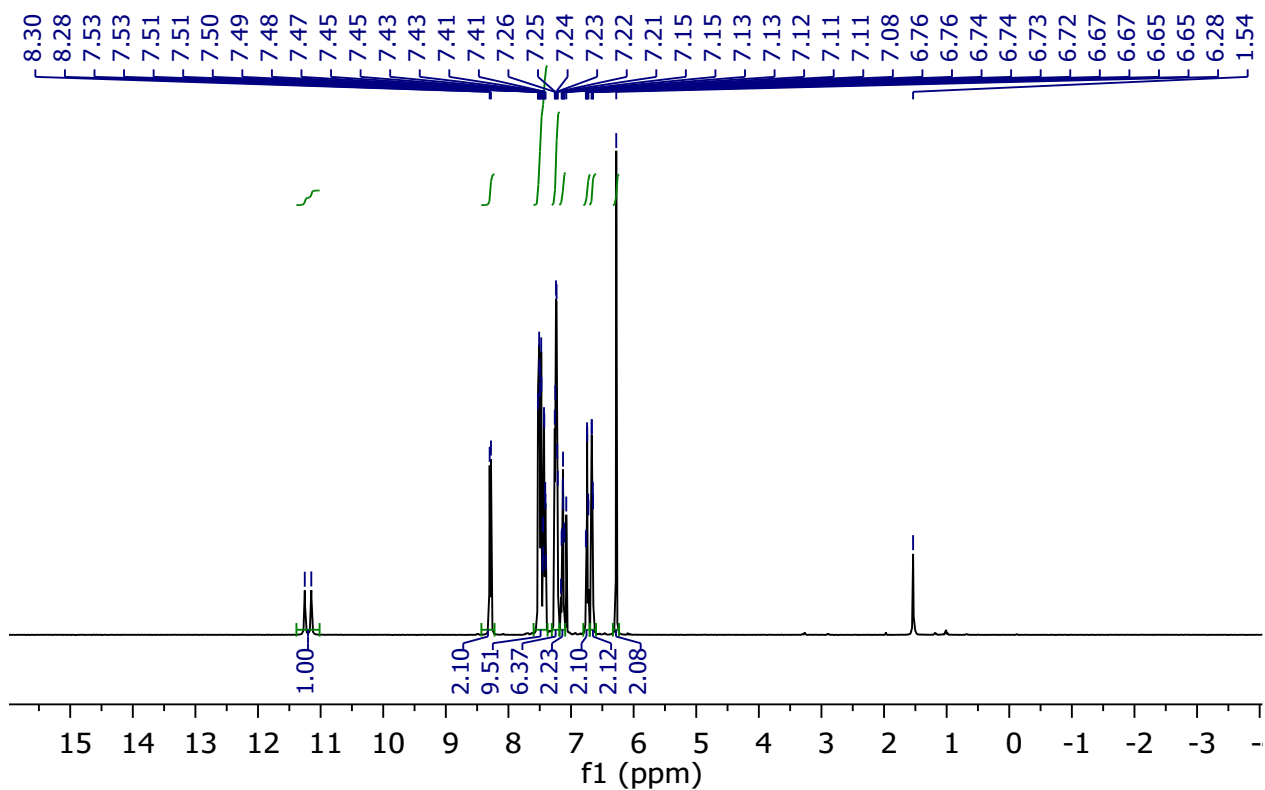

Figure S17:  $^1\text{H}$  NMR of **4** in  $\text{CDCl}_3$

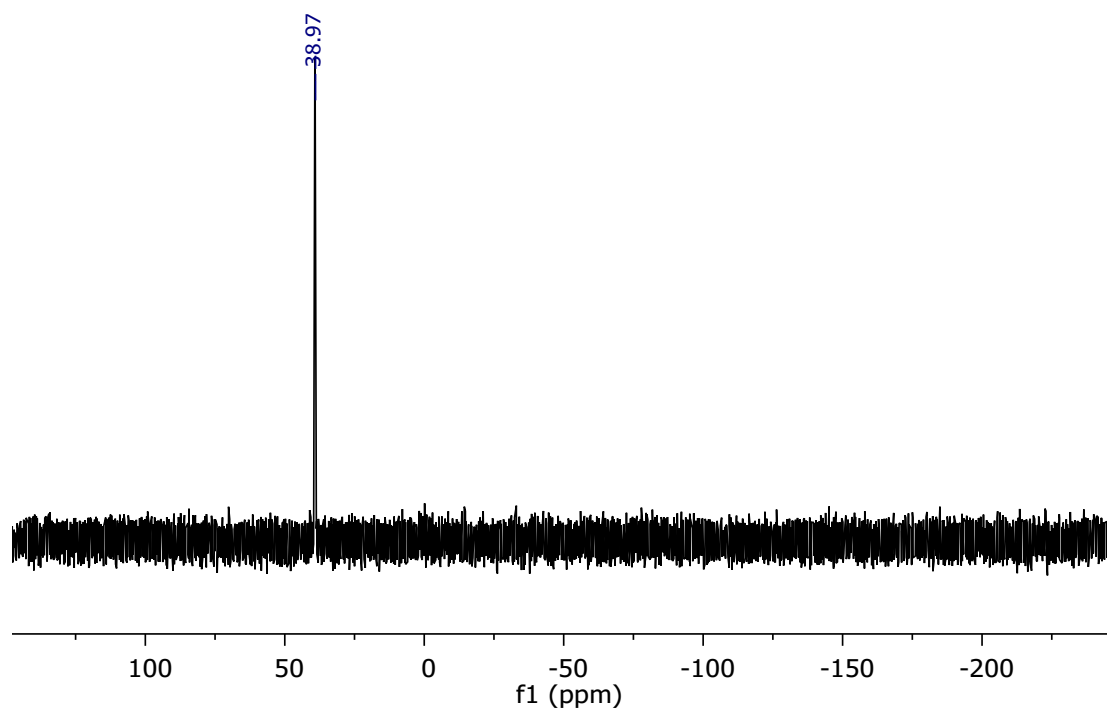

**Figure S18:**  $^{31}\text{P}$  NMR of **4** in  $\text{CDCl}_3$



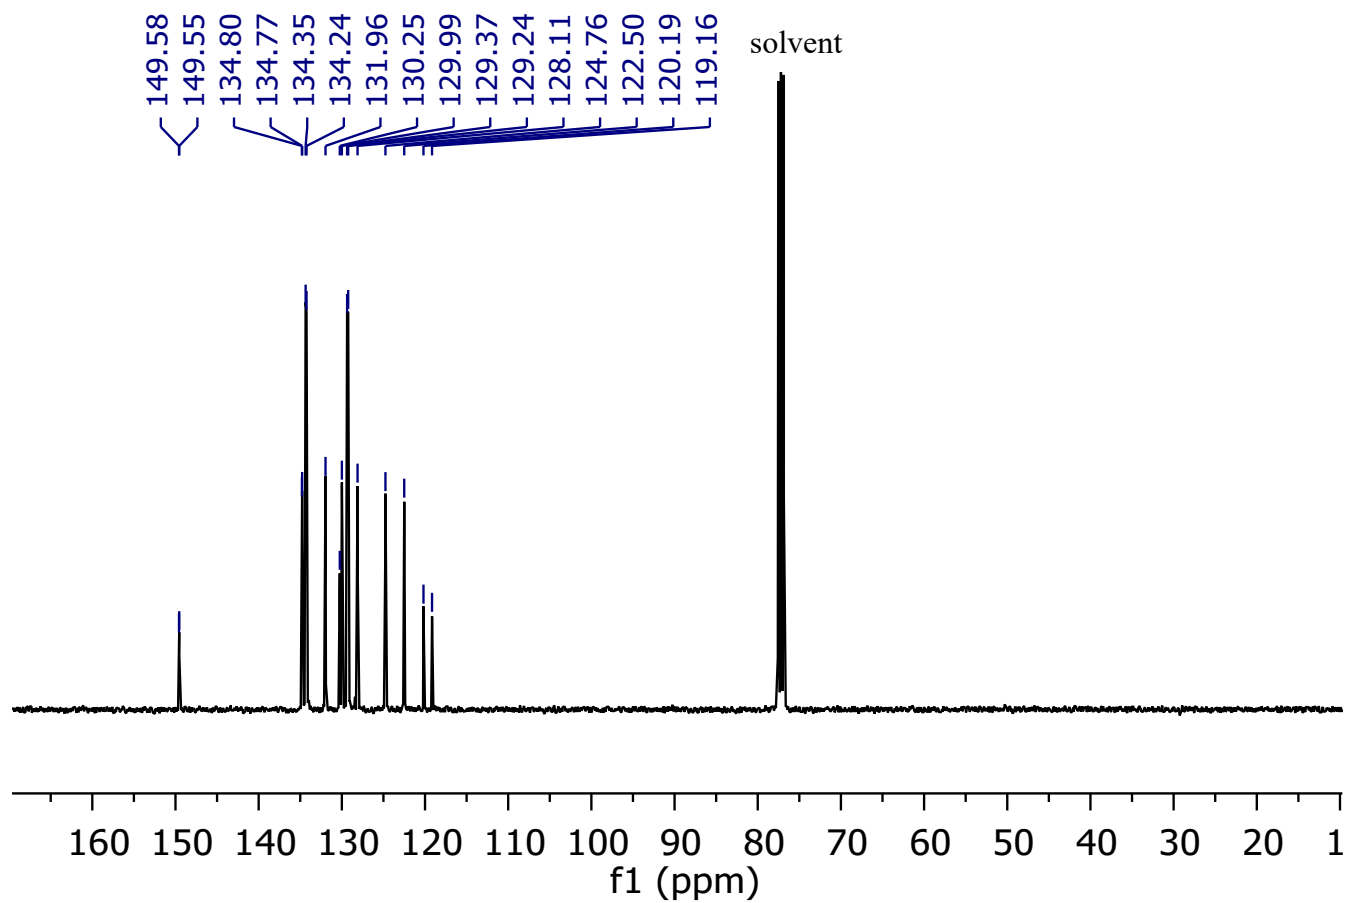

**Figure S19:**  $^{13}\text{C}$  NMR of **4** in  $\text{CDCl}_3$

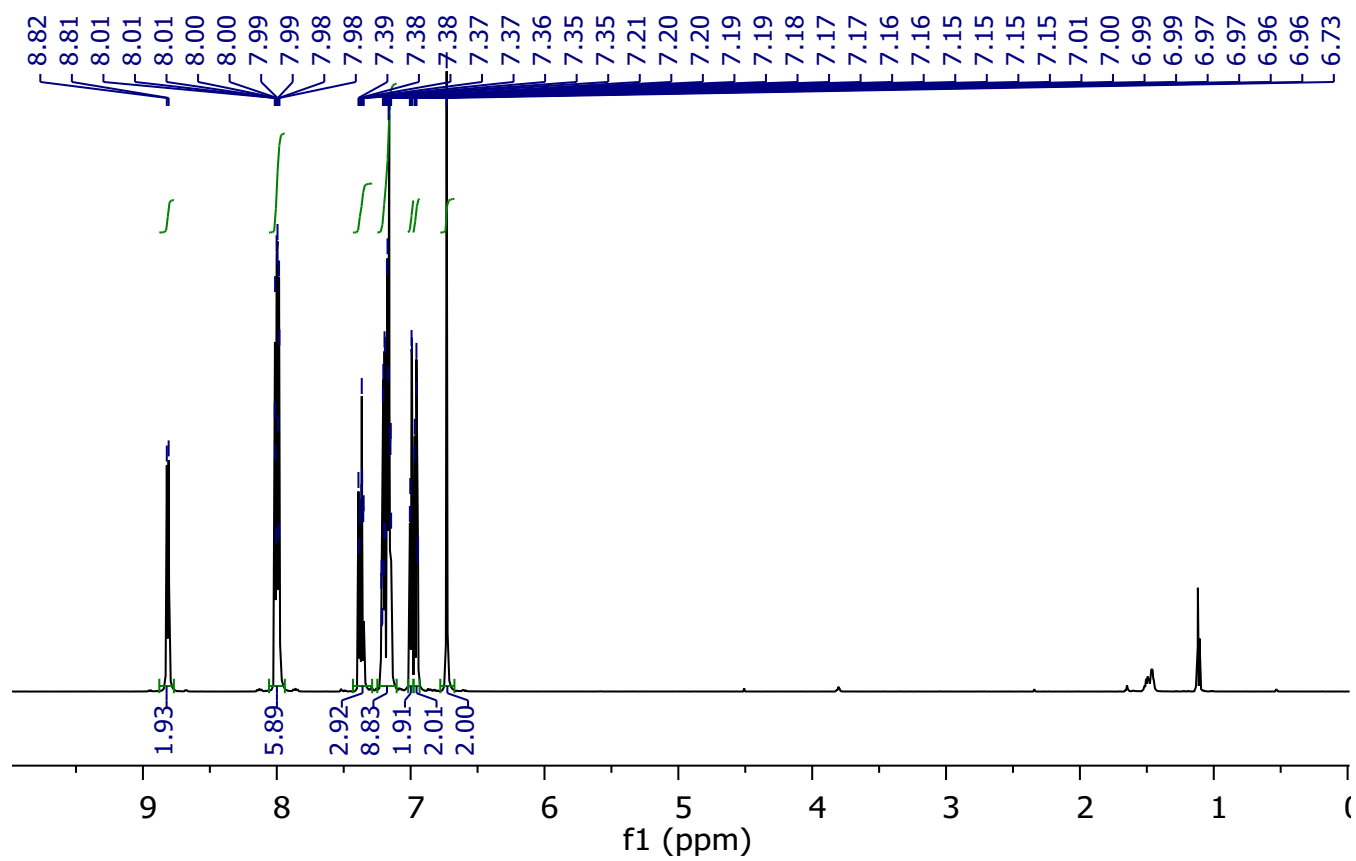

Figure S20:  $^1\text{H}$  NMR of 5 in  $\text{C}_6\text{D}_6$

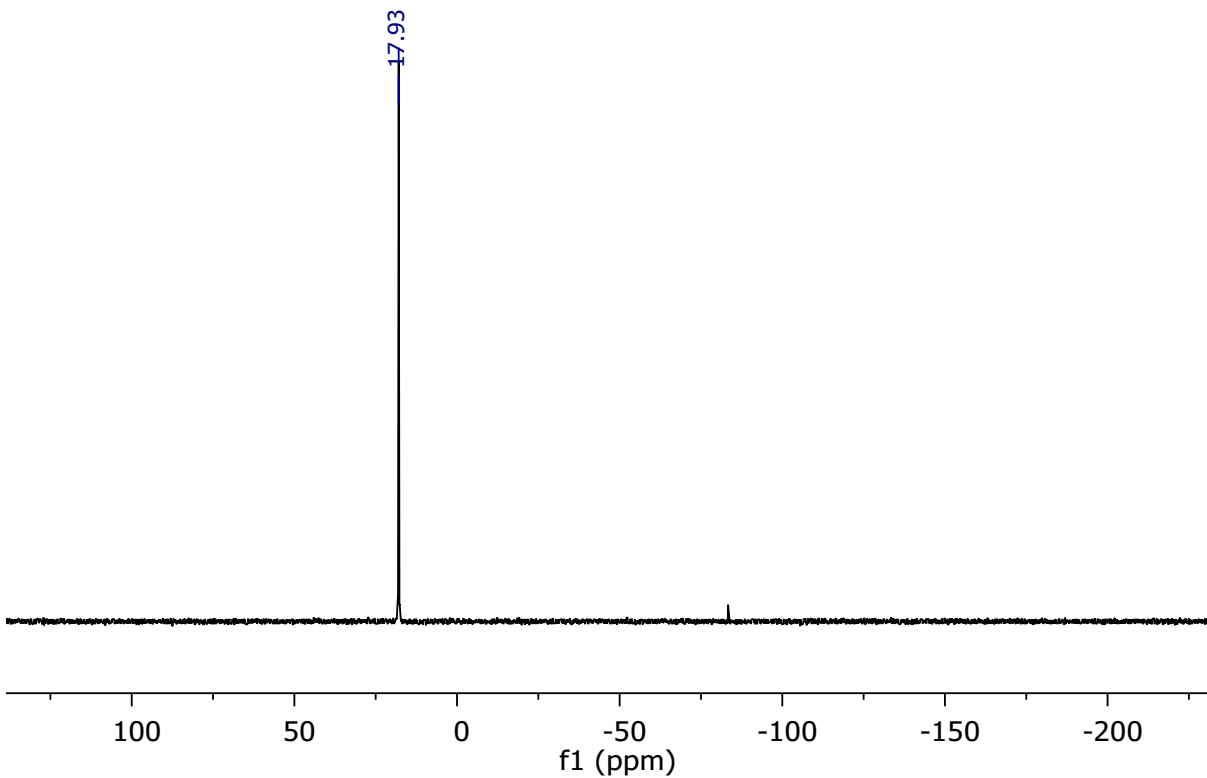

Figure S21: <sup>31</sup>P NMR of 5 in C<sub>6</sub>D<sub>6</sub>

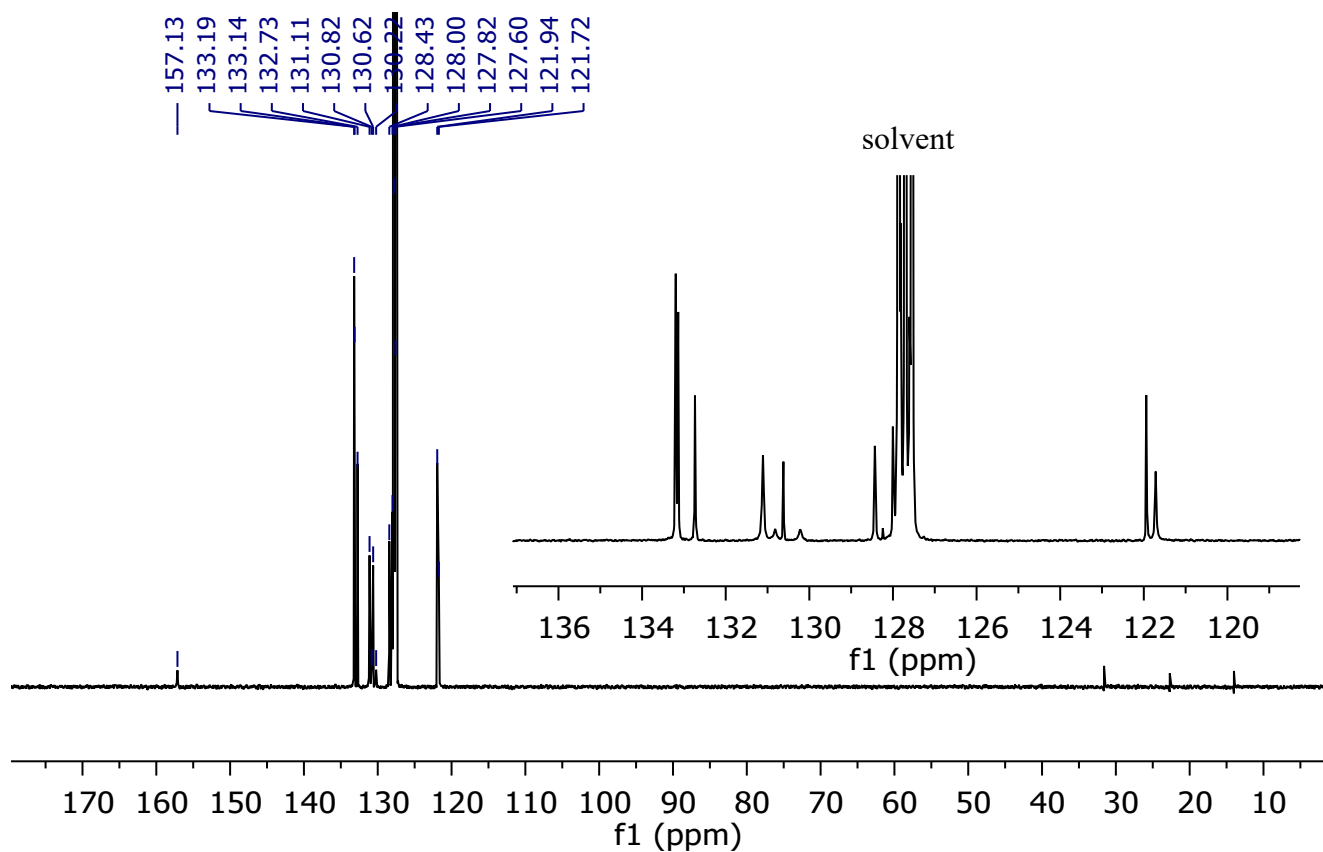

Figure S22: <sup>13</sup>C NMR of 5 in C<sub>6</sub>D<sub>6</sub>

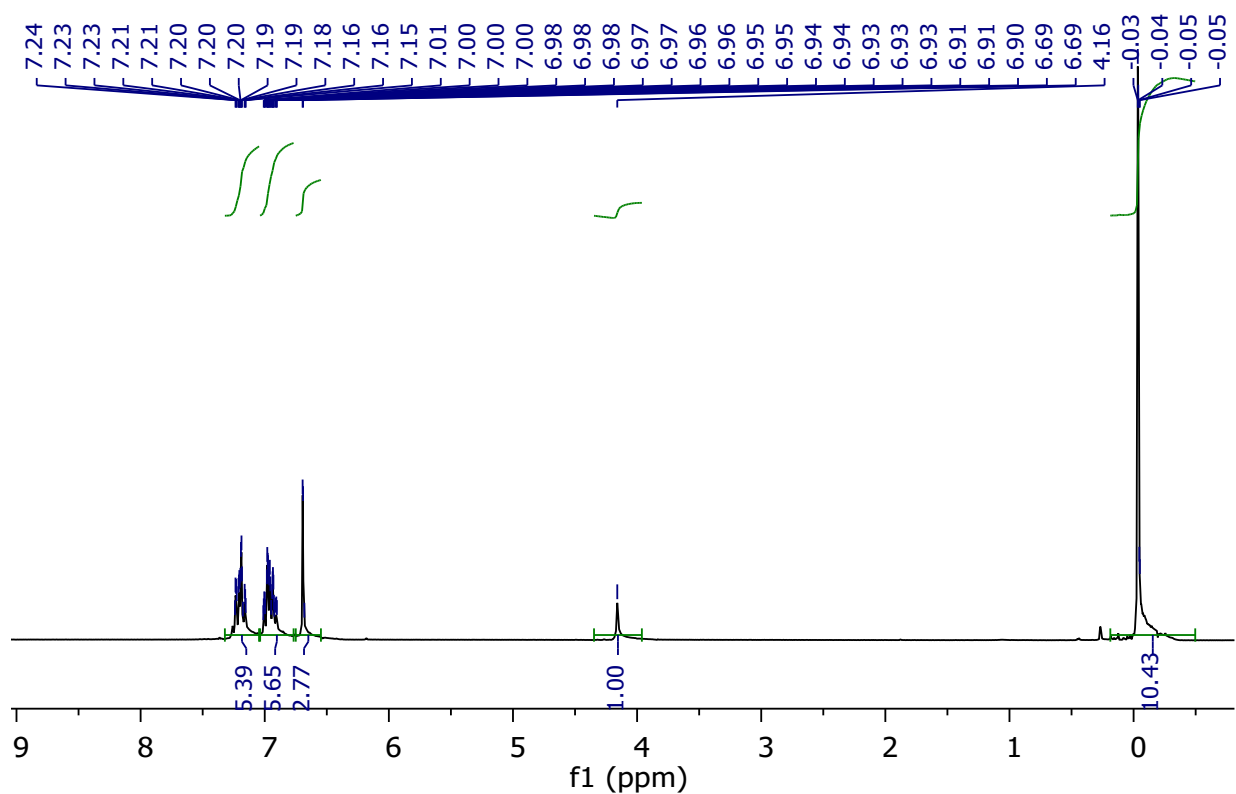

Figure S23:  $^1\text{H}$  NMR of **6** in  $\text{CDCl}_3$

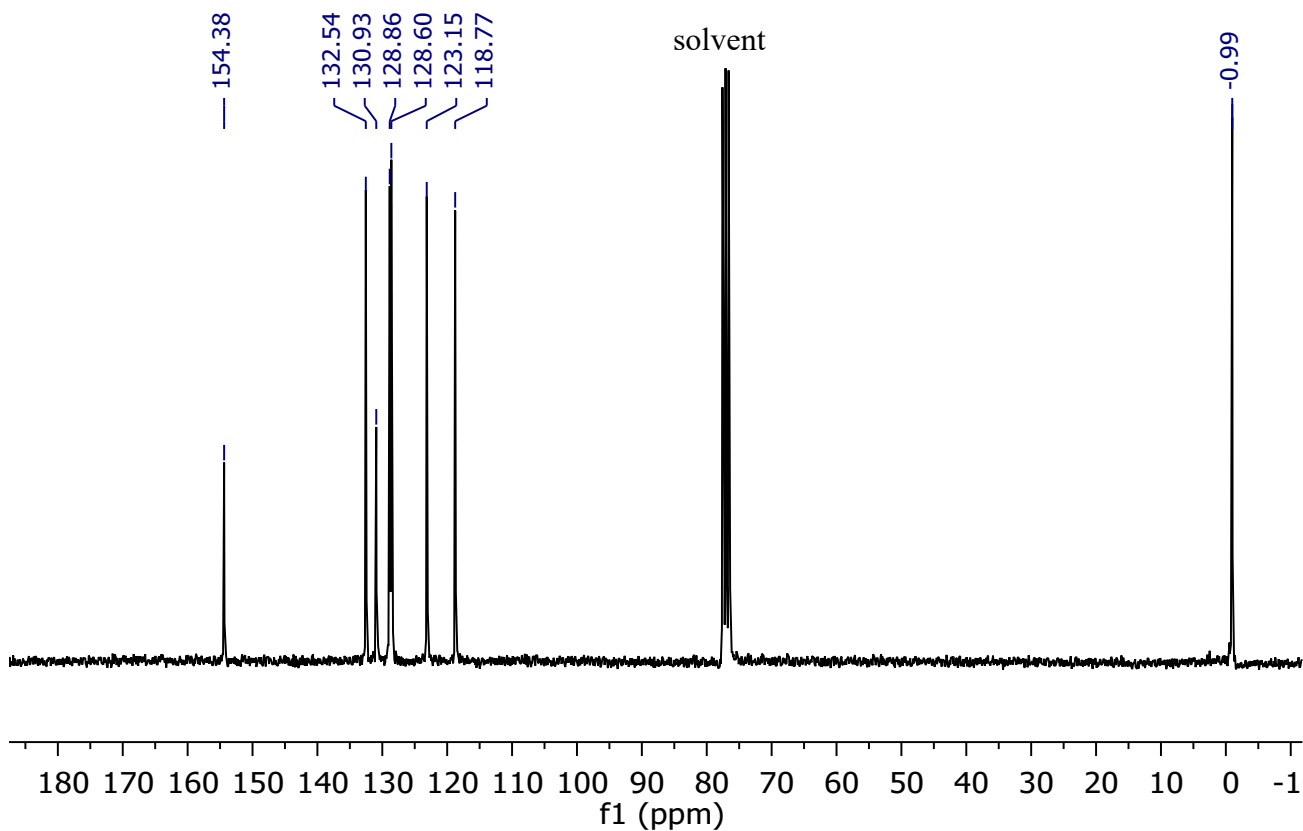

Figure S24:  $^{13}\text{C}$  NMR of **6** in  $\text{CDCl}_3$

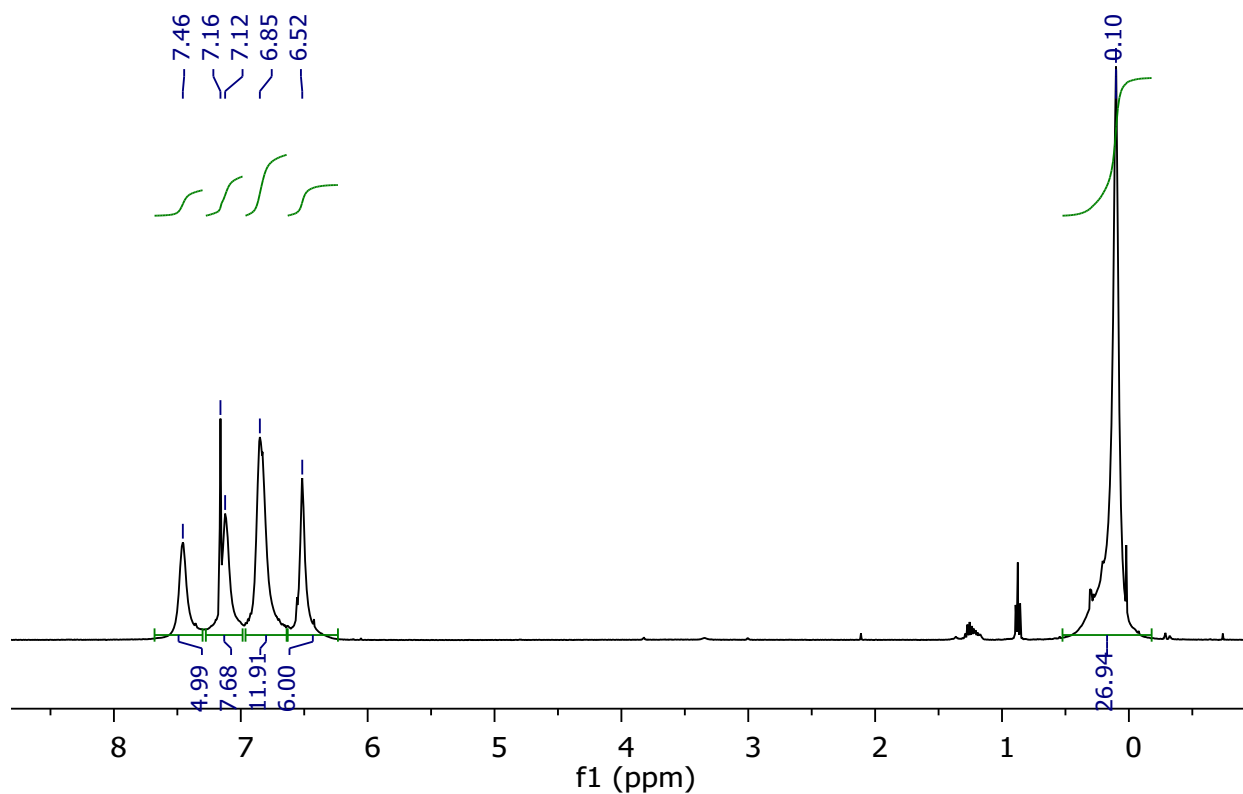

Figure S25:  $^1\text{H}$  NMR of 7 in  $\text{C}_6\text{D}_6$

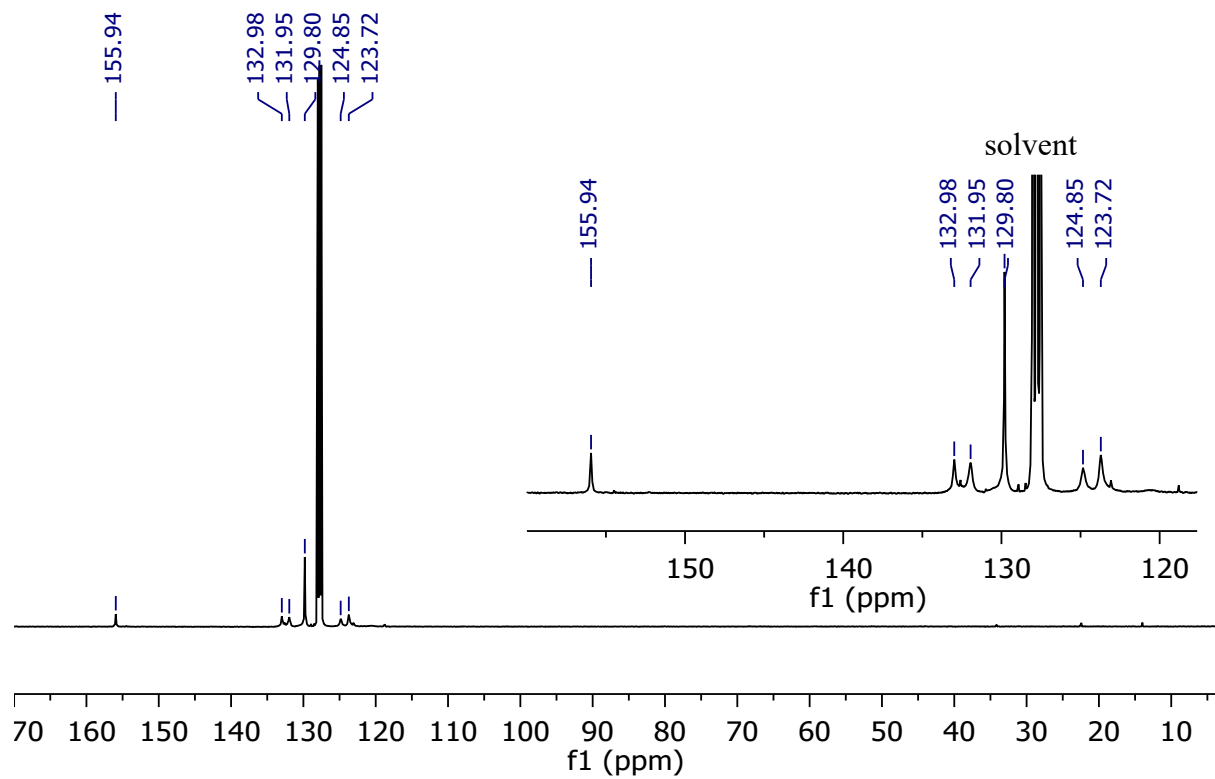

Figure S26:  $^{13}\text{C}$  NMR of 7 in  $\text{C}_6\text{D}_6$

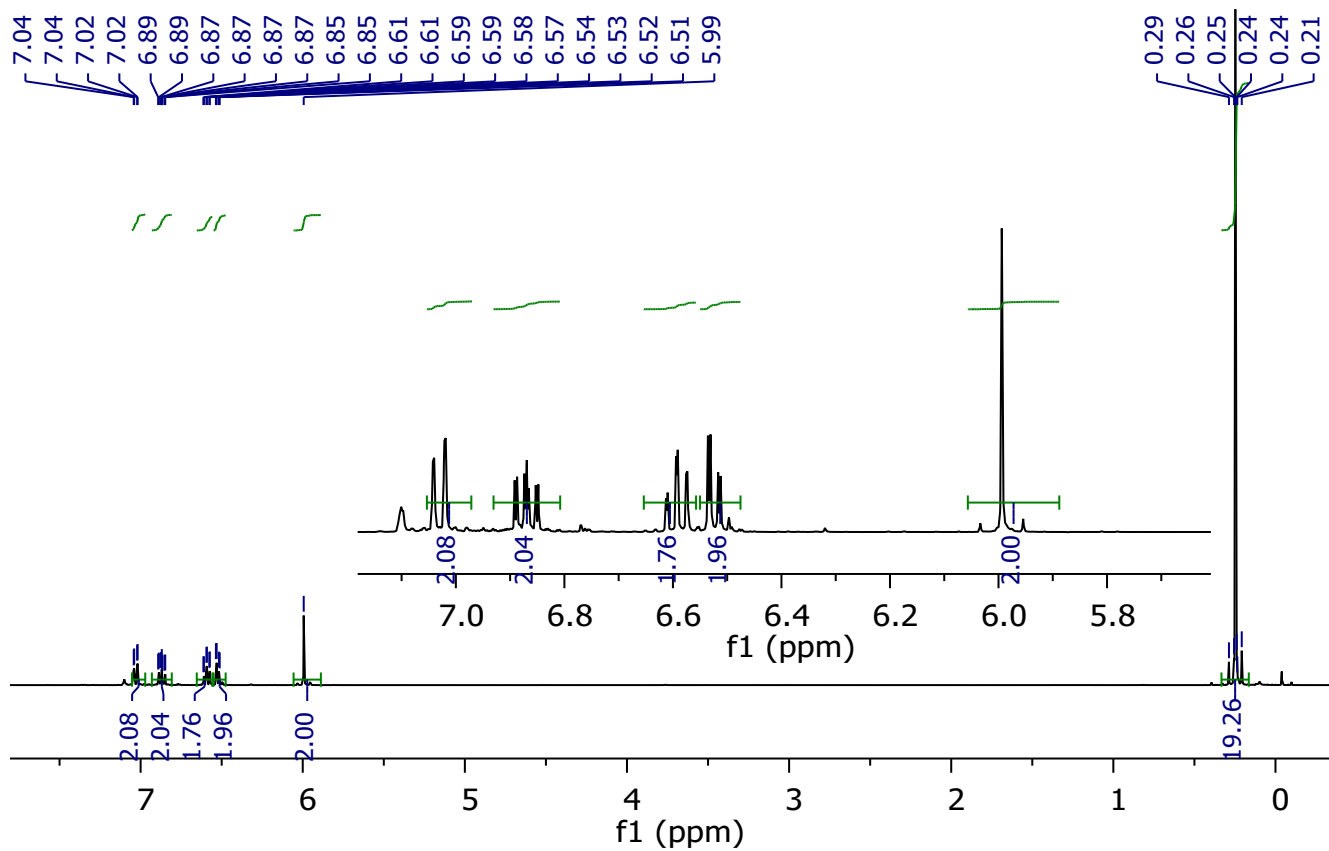

Figure S27:  $^1\text{H}$  NMR of **8** in  $\text{C}_6\text{D}_6$

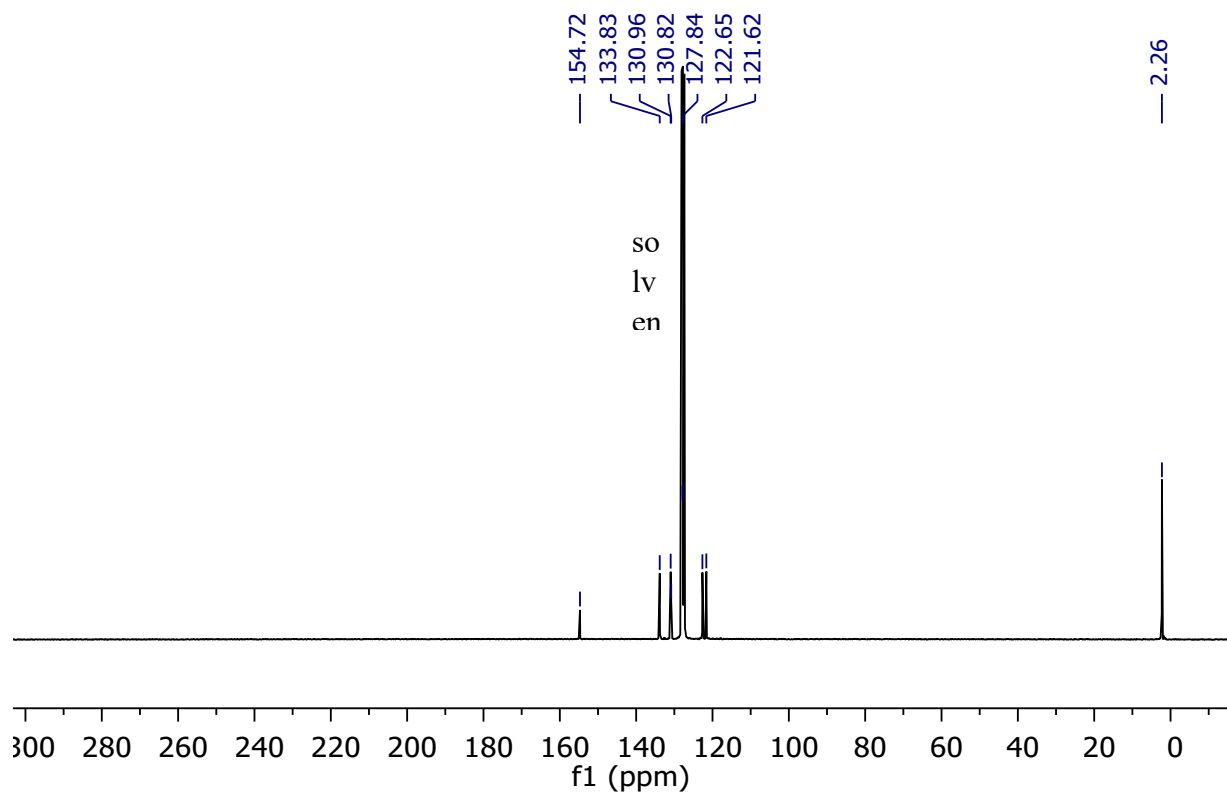

Figure S28:  $^{13}\text{C}$  NMR of **8** in  $\text{C}_6\text{D}_6$

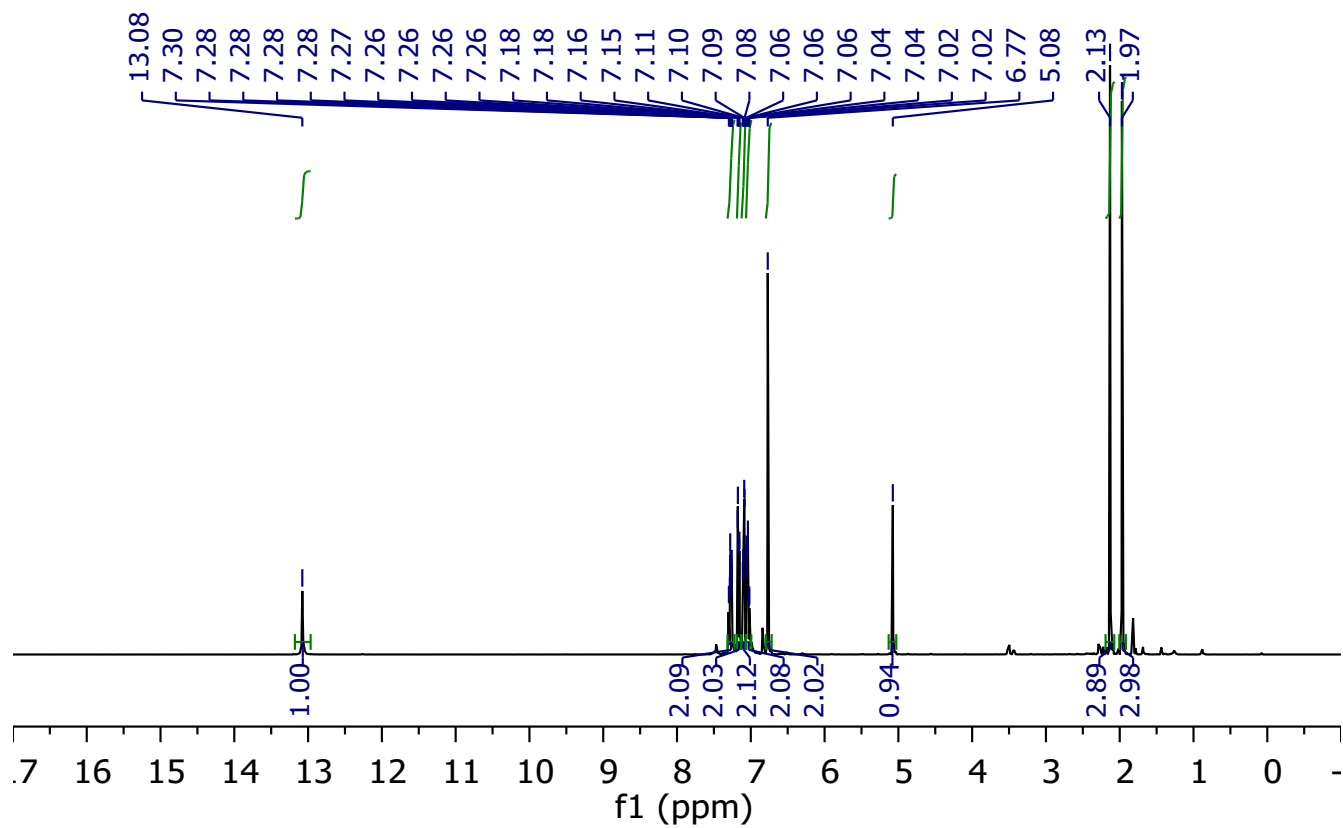

Figure S29:  $^1\text{H}$  NMR of **9** in  $\text{CDCl}_3$

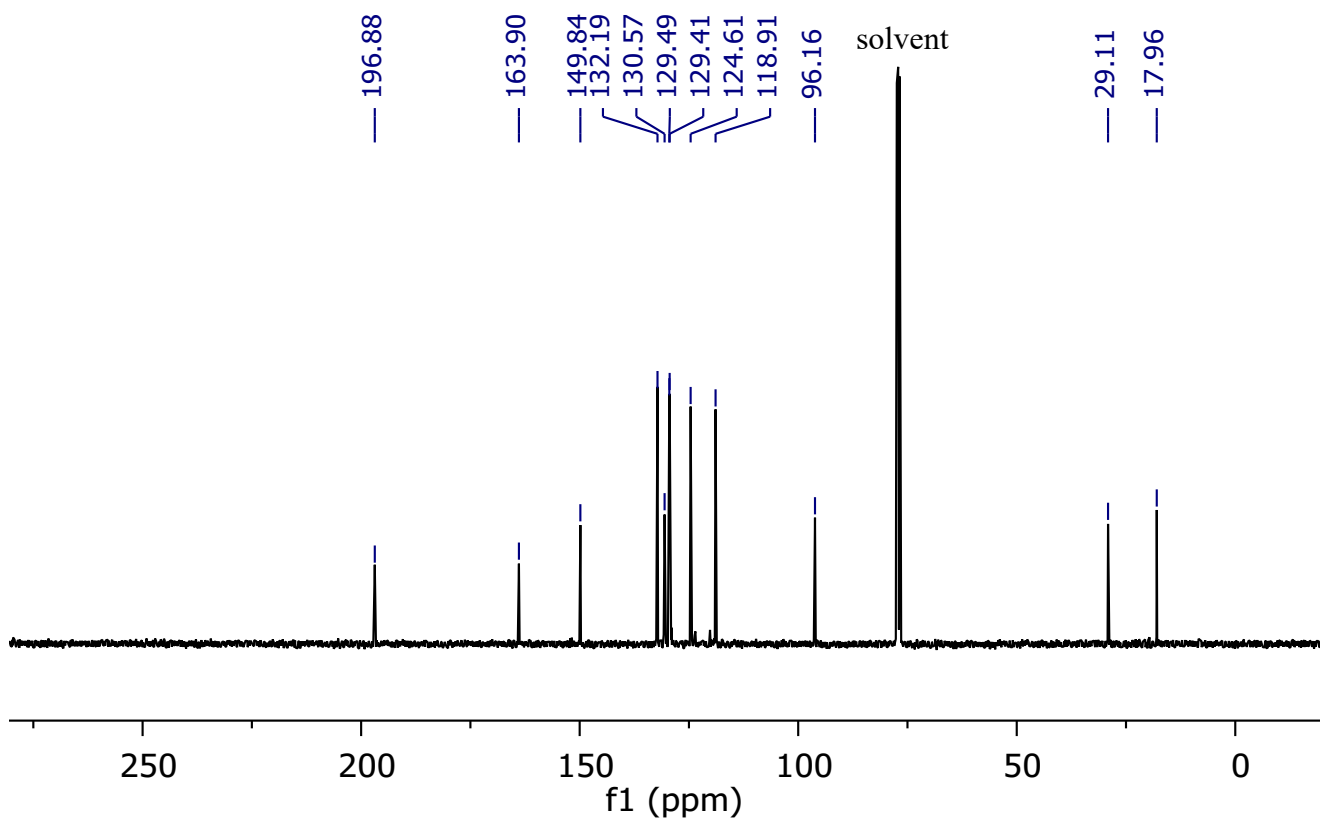

Figure S30: <sup>13</sup>C NMR of **9** in CDCl<sub>3</sub>

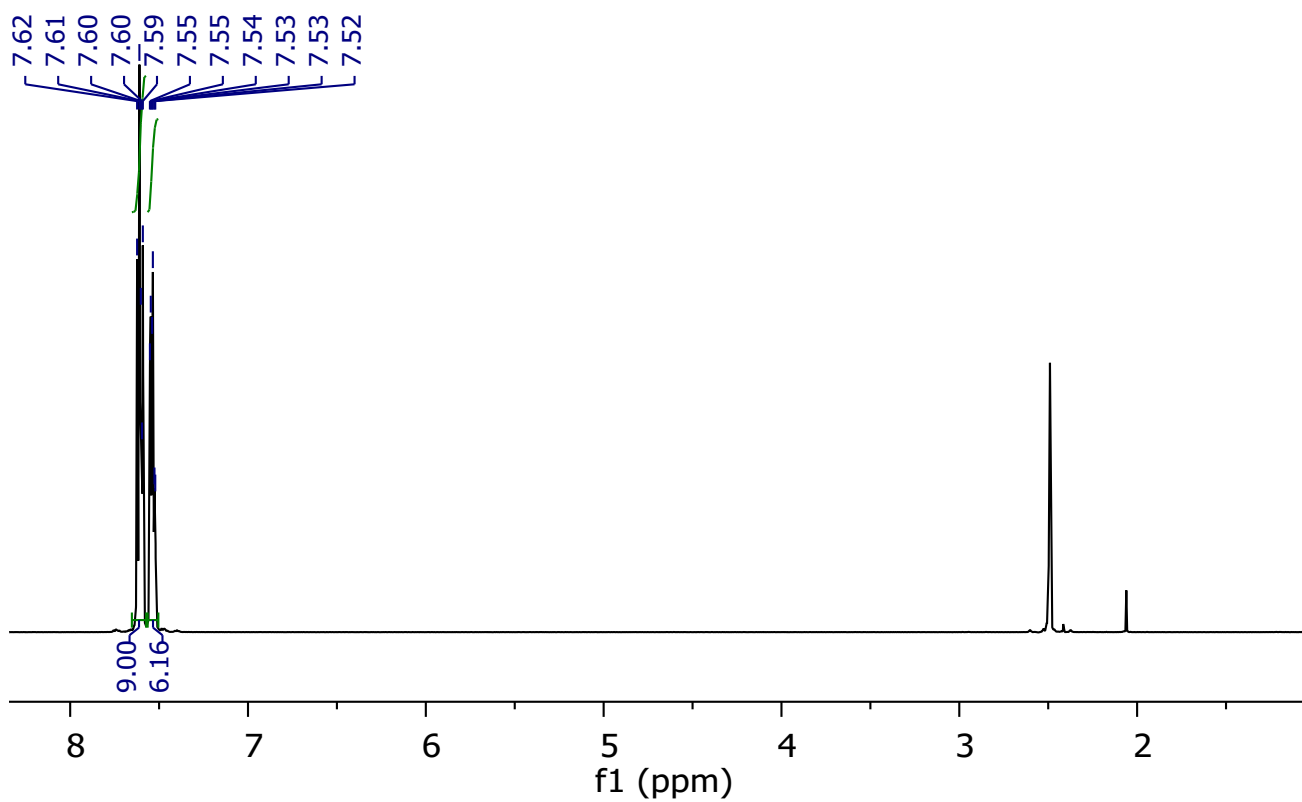

Figure S31: <sup>1</sup>H NMR of PBr<sub>2</sub>Ph<sub>3</sub> in DMSO-*d*<sub>6</sub>



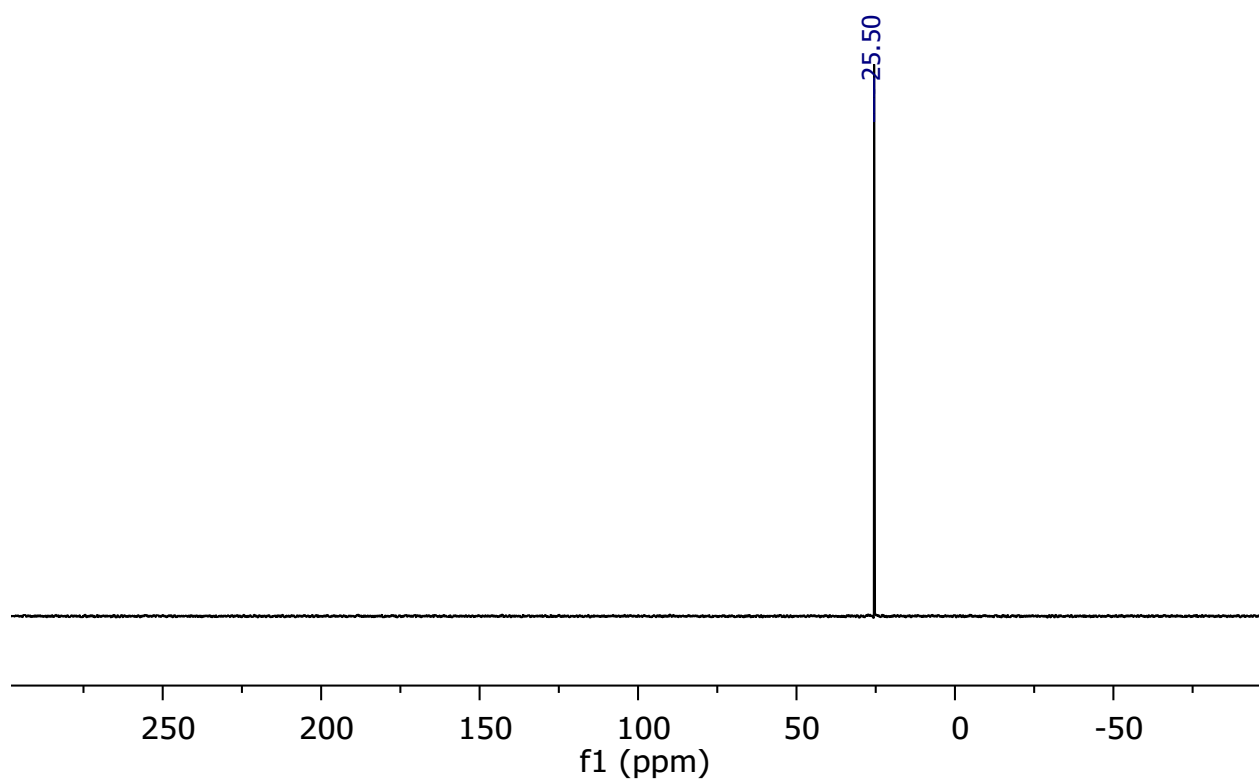

**Figure S32:**  $^{31}\text{P}$  NMR of  $\text{PBr}_2\text{Ph}_3$  in  $\text{DMSO-}d_6$

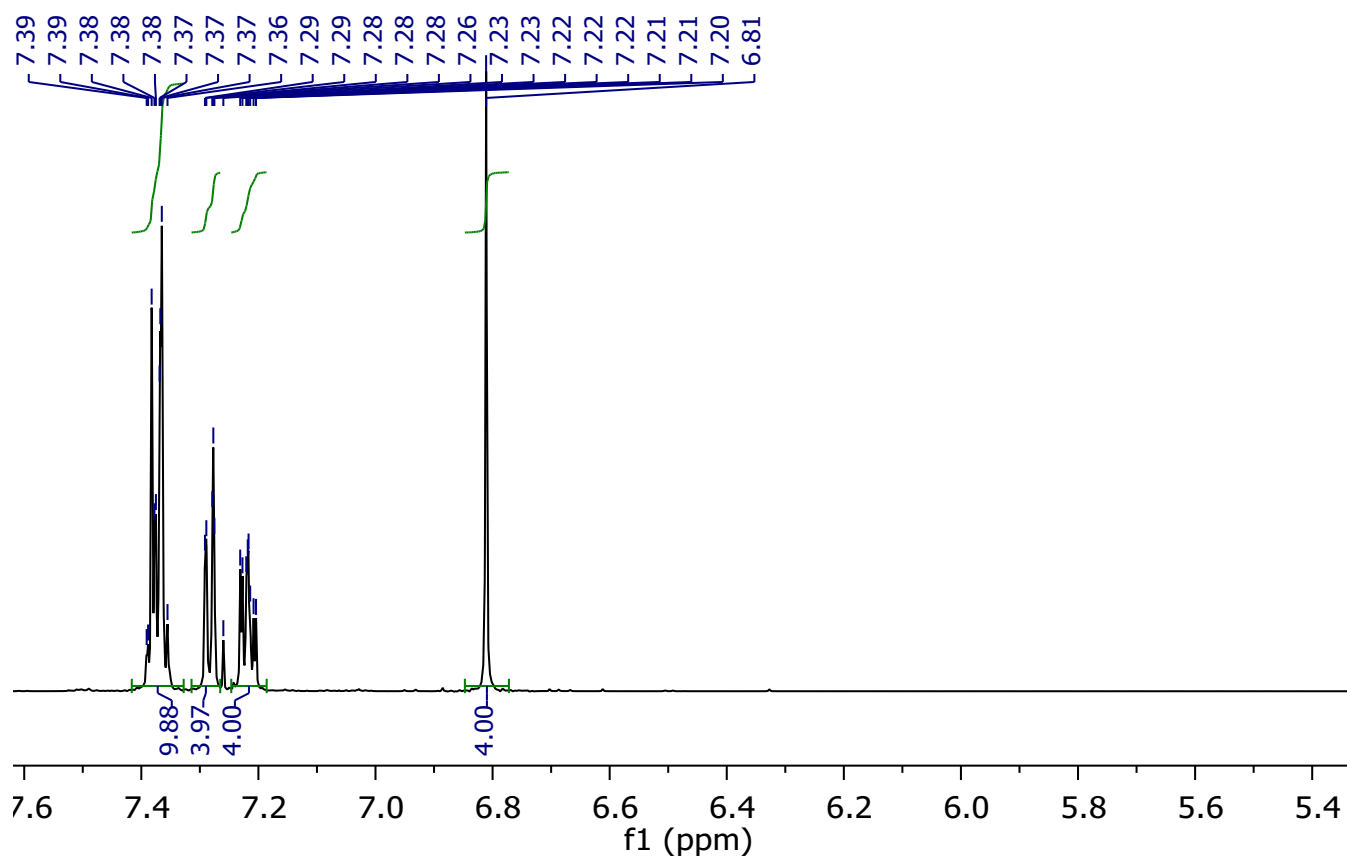

Figure S33:  $^1\text{H}$  NMR of **10** in  $\text{CDCl}_3$

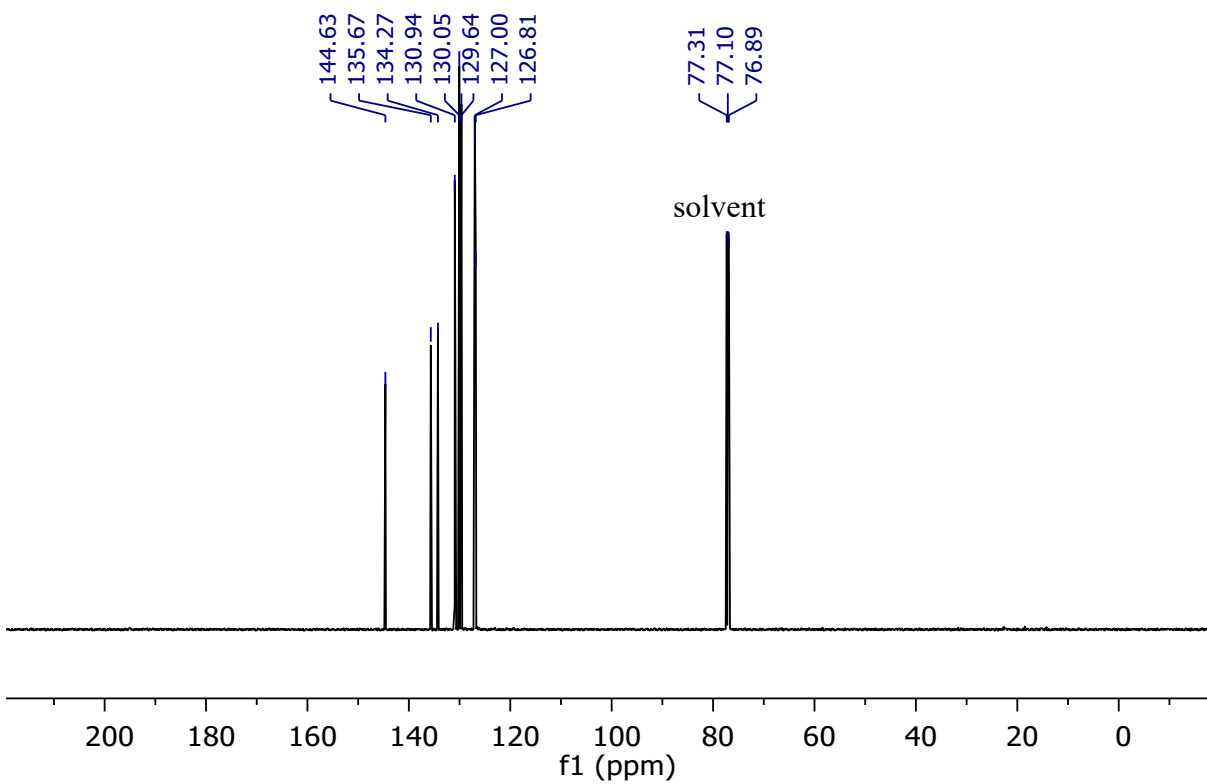

Figure S34:  $^{13}\text{C}$  NMR of **10** in  $\text{CDCl}_3$

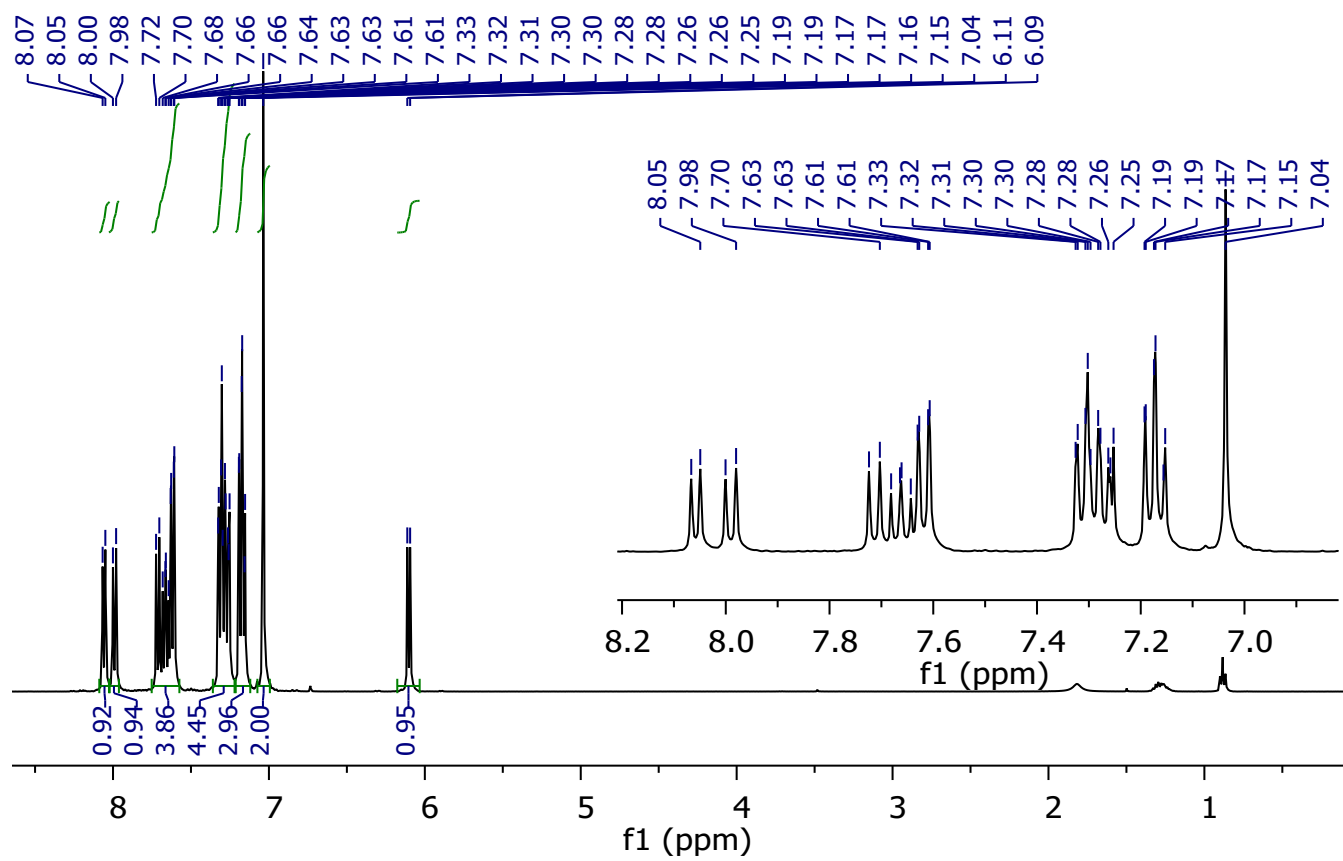

Figure S35:  $^1\text{H}$  NMR of **11** in  $\text{CDCl}_3$

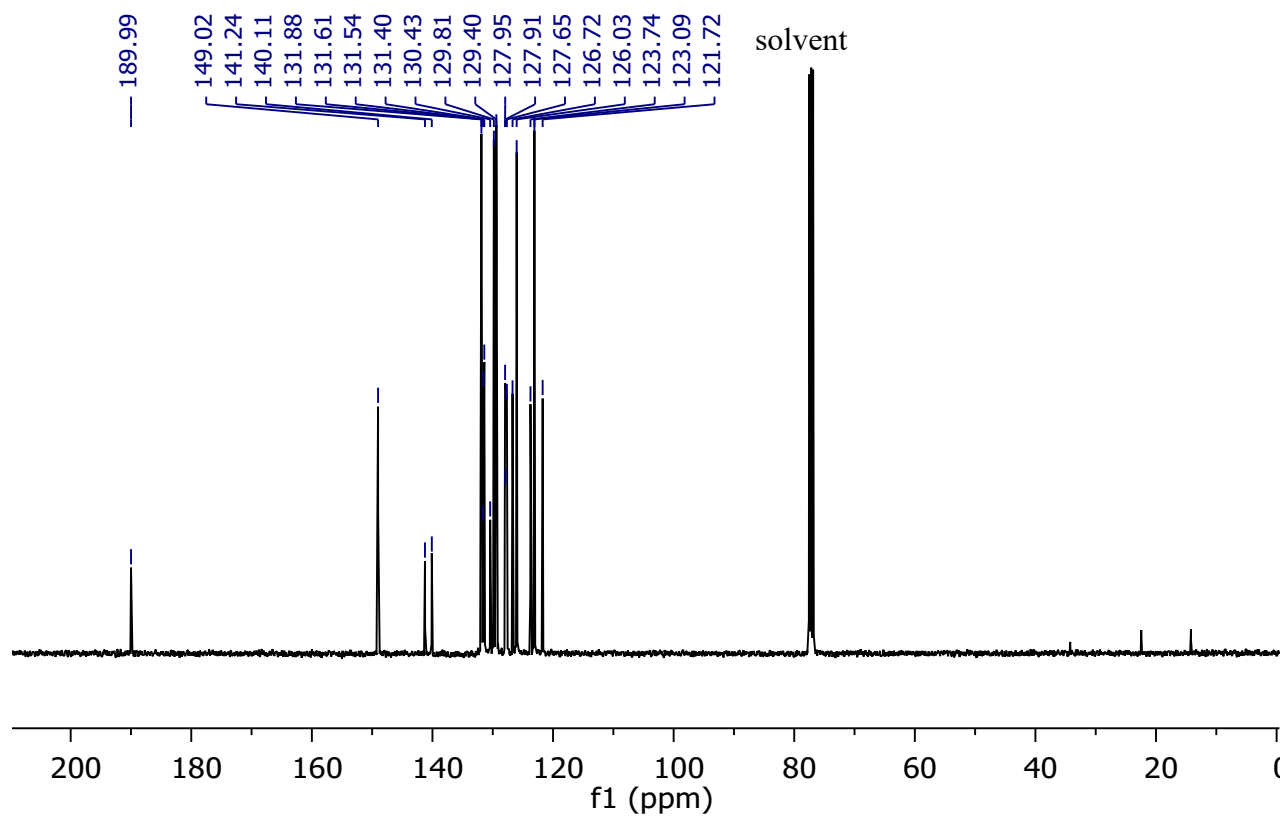

Figure S36:  $^{13}\text{C}$  NMR of **11** in  $\text{CDCl}_3$

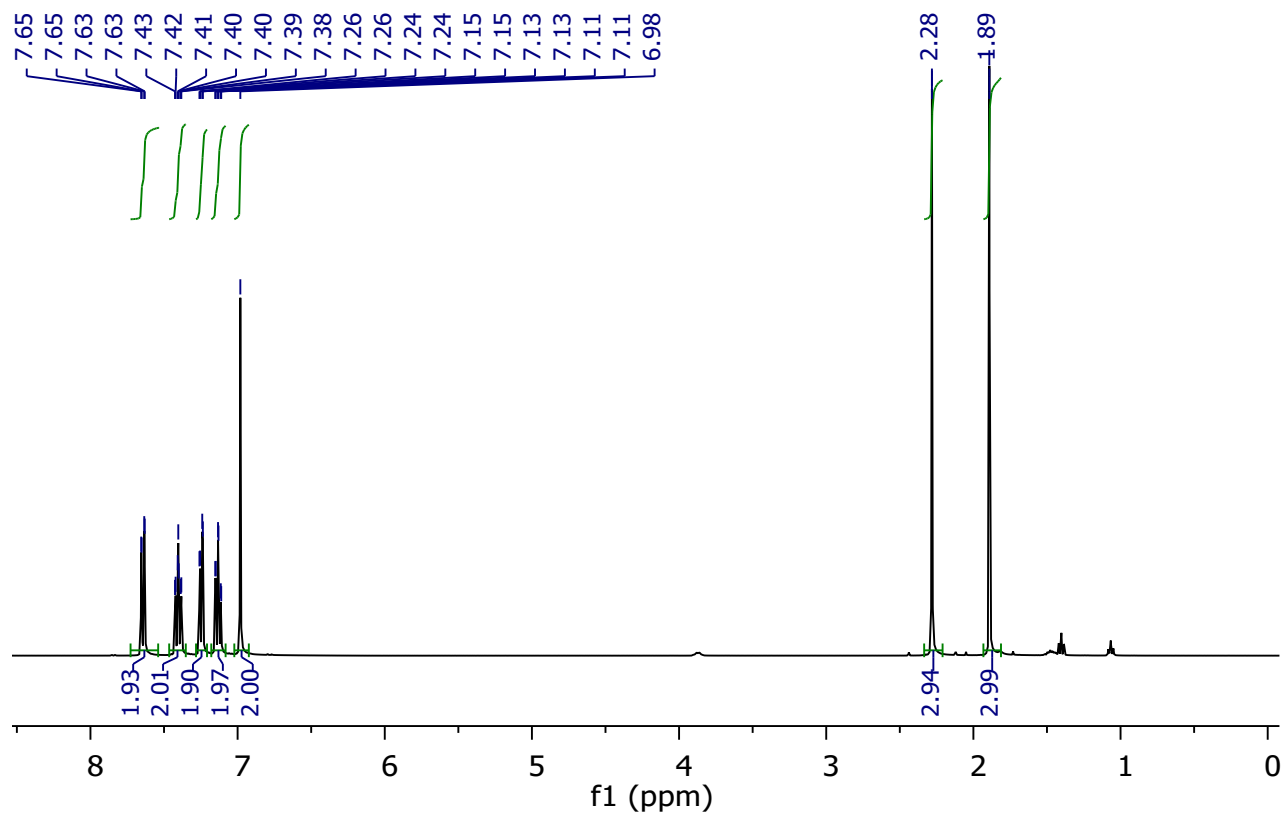

Figure S37:  $^1\text{H}$  NMR of **12** in  $\text{CDCl}_3$

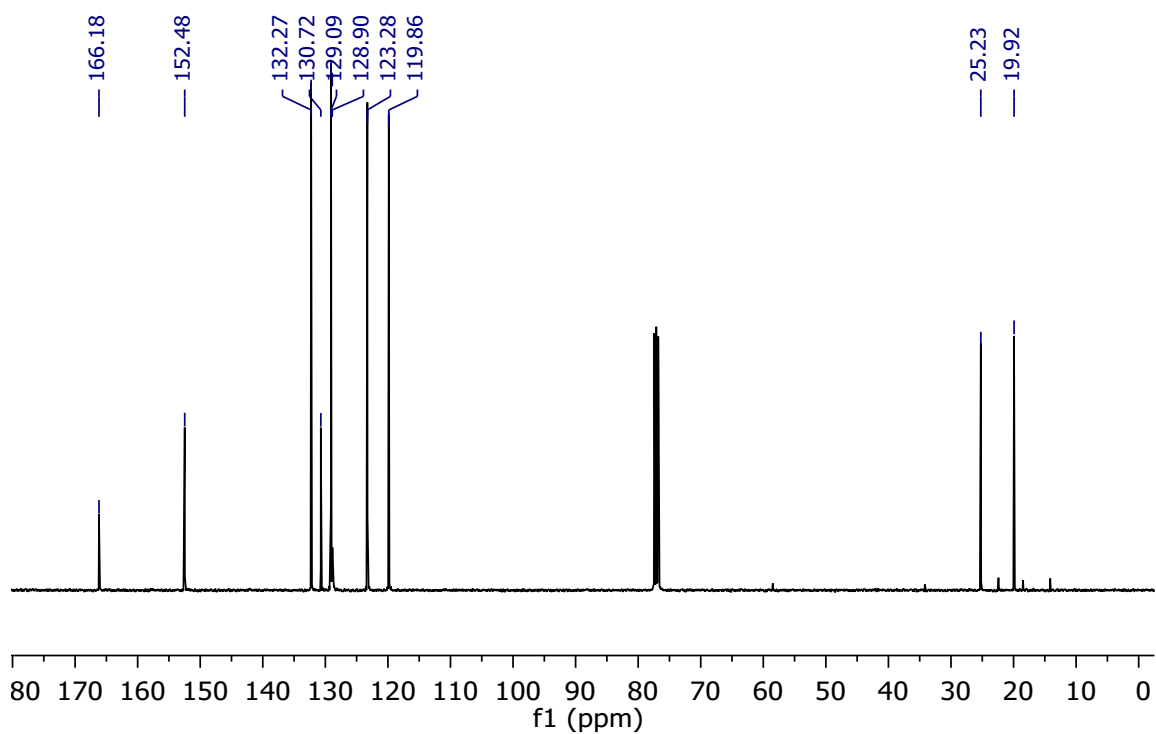

**Figure S38:**  $^{13}\text{C}$  NMR of **12** in  $\text{CDCl}_3$

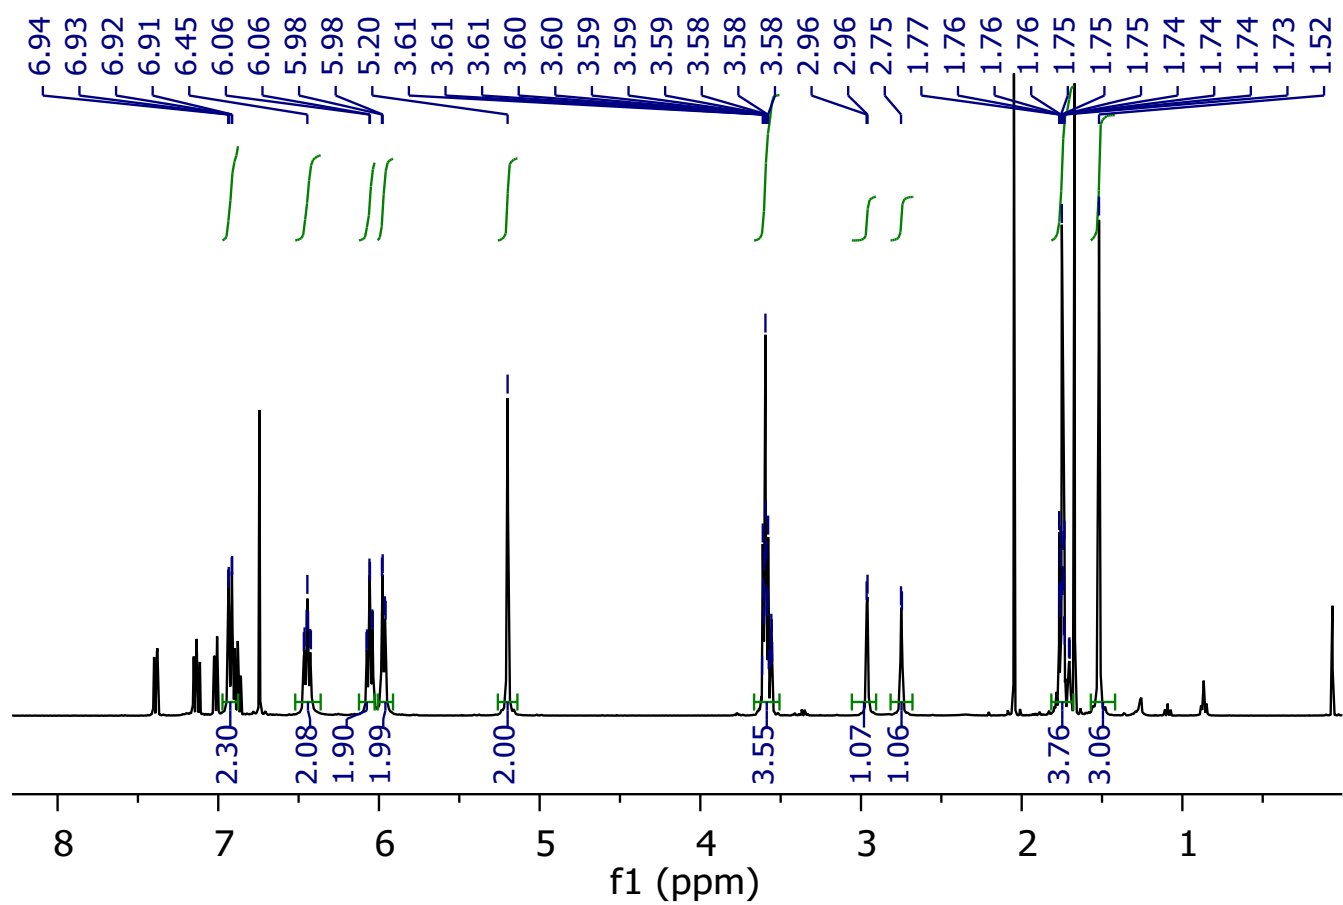

Figure S39:  $^1\text{H}$  NMR of **13** in  $\text{THF-d}_8$

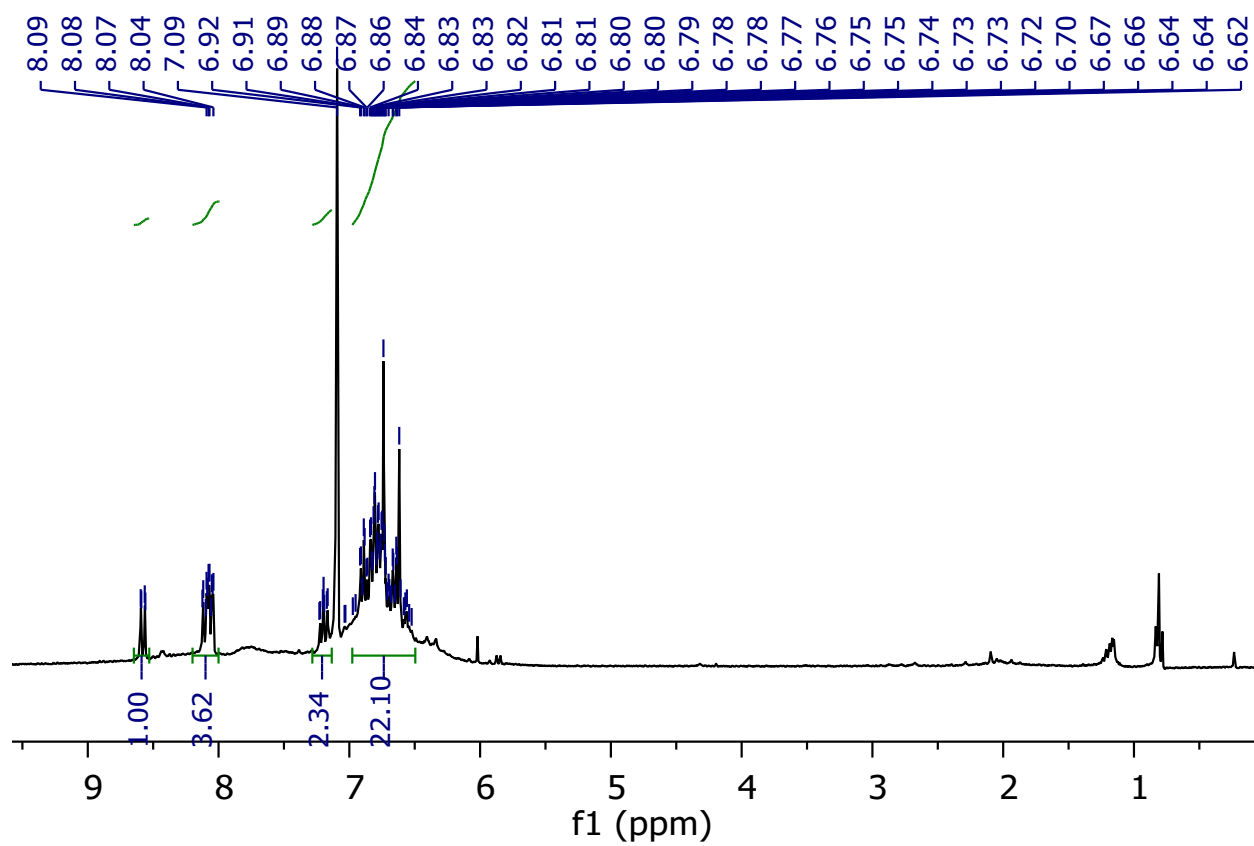

Figure S40:  $^1\text{H}$  NMR of **14** in  $\text{C}_6\text{D}_6$

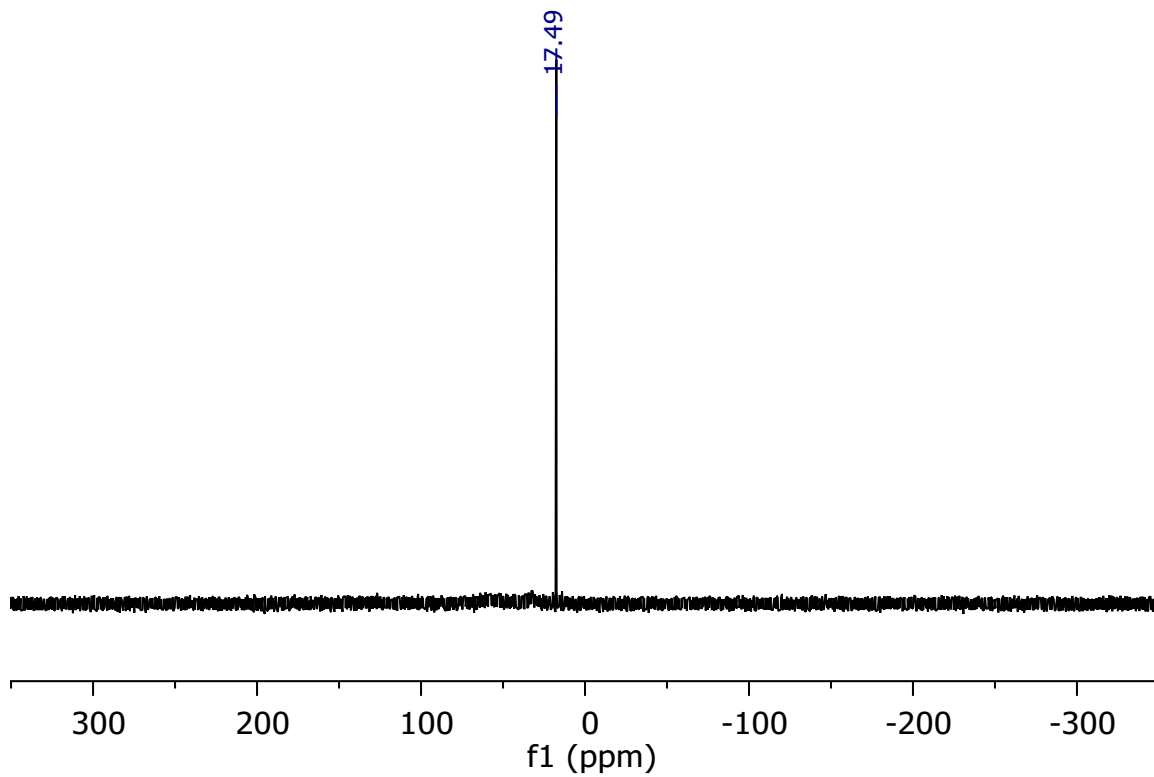

Figure S41:  $^{31}\text{P}$  NMR of **14** in  $\text{C}_6\text{D}_6$

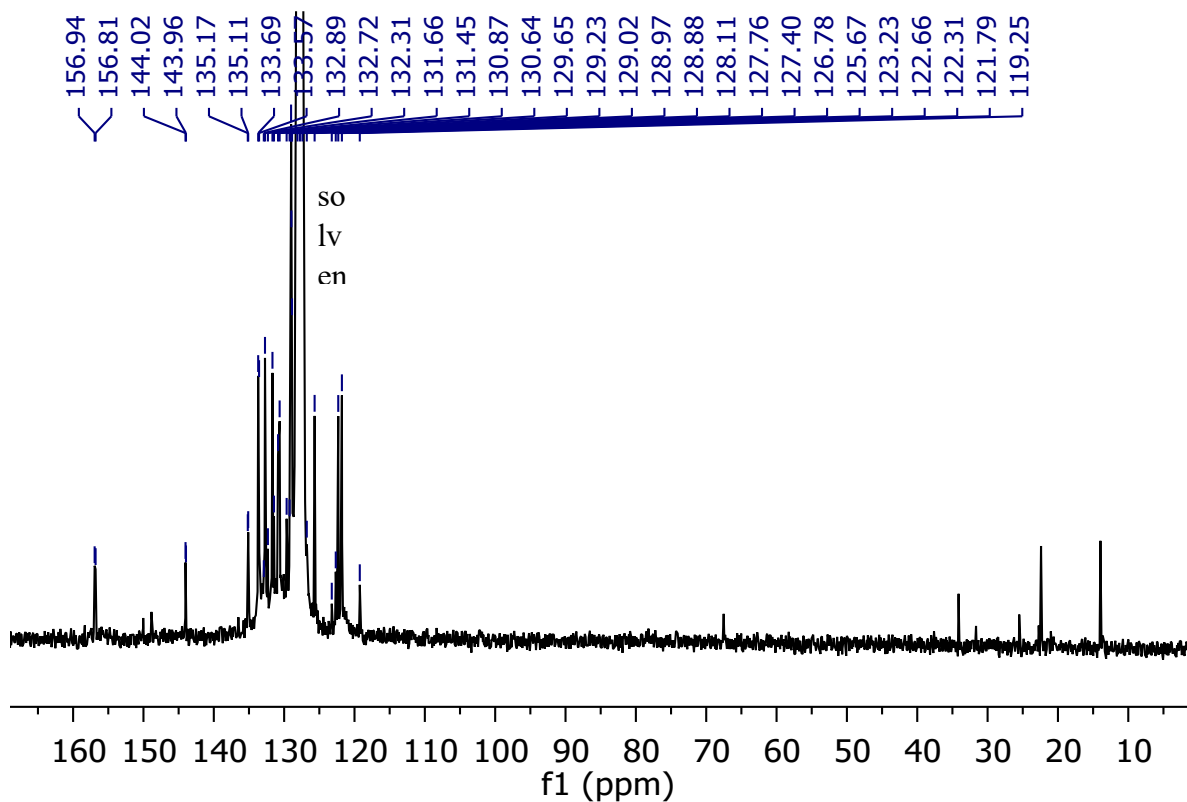

Figure S42:  $^{13}\text{C}$  NMR of **14** in  $\text{C}_6\text{D}_6$

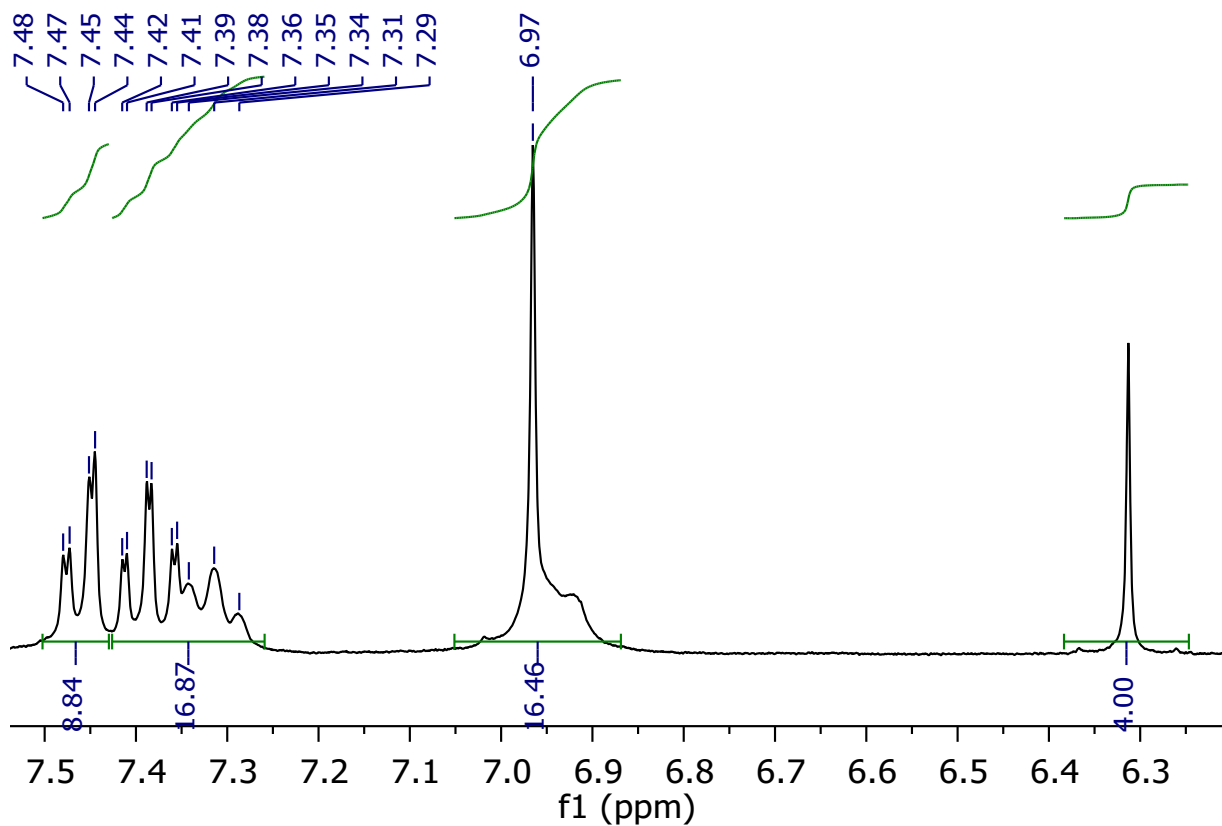

Figure S43:  $^1\text{H}$  NMR of **16** in  $\text{CD}_2\text{Cl}_2$



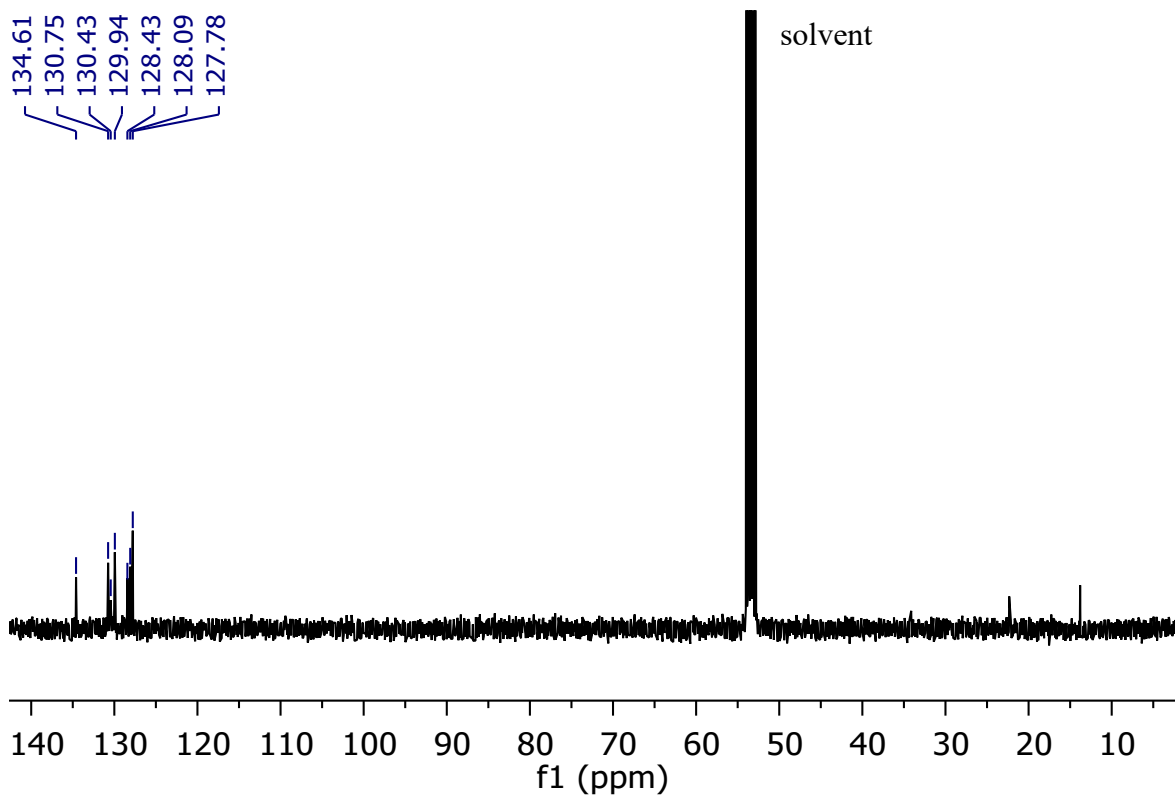

Figure S44:  $^{13}\text{C}$  NMR of **16** in  $\text{CD}_2\text{Cl}_2$

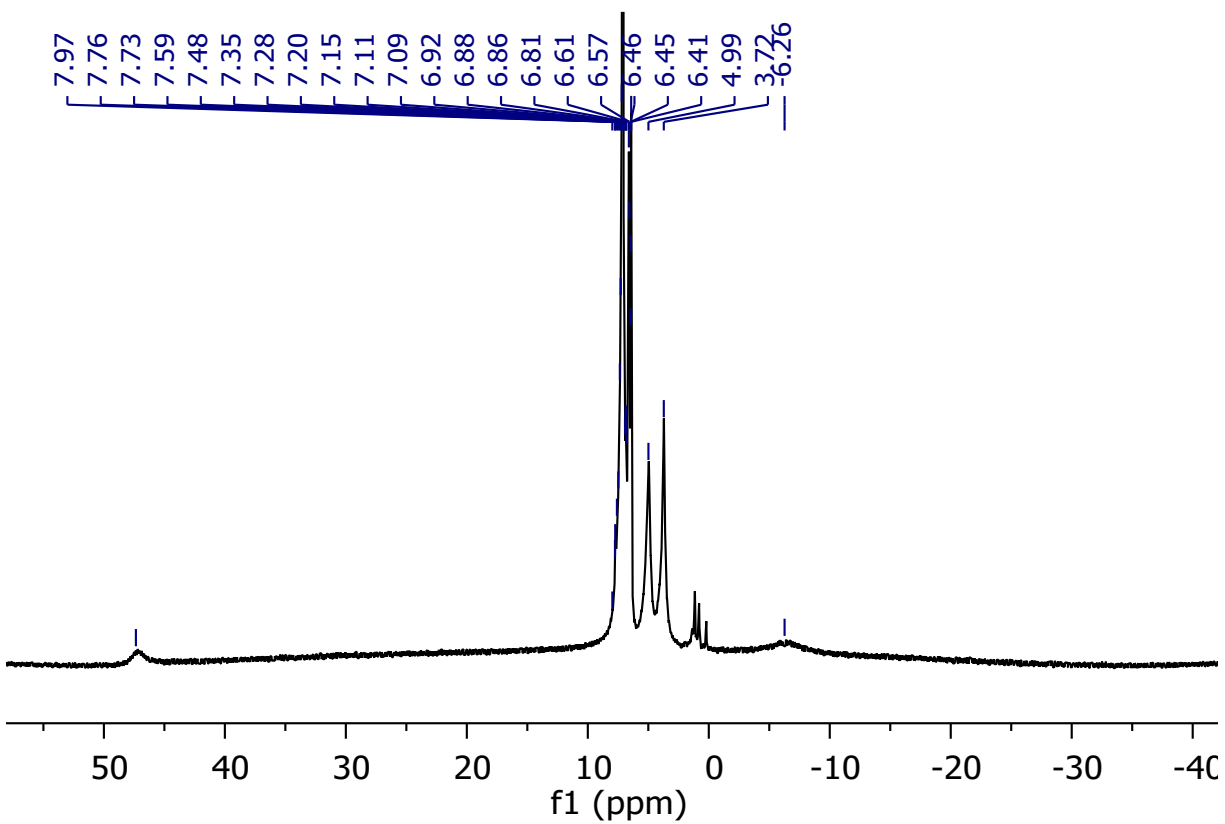

Figure S45:  $^1\text{H}$  NMR of **17** in  $\text{C}_6\text{D}_6$ .

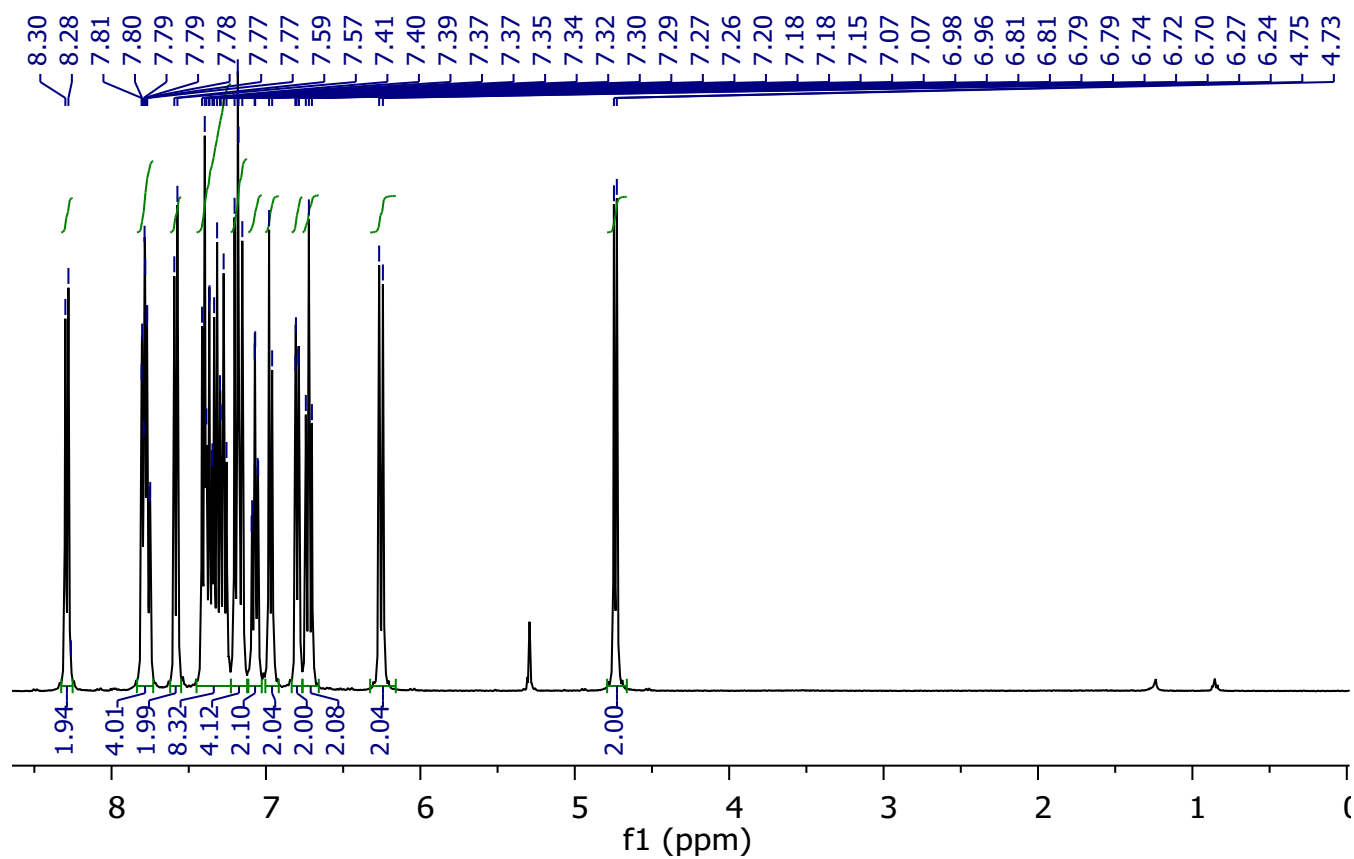

Figure S46:  $^1\text{H}$  NMR of **18** in  $\text{CD}_2\text{Cl}_2$

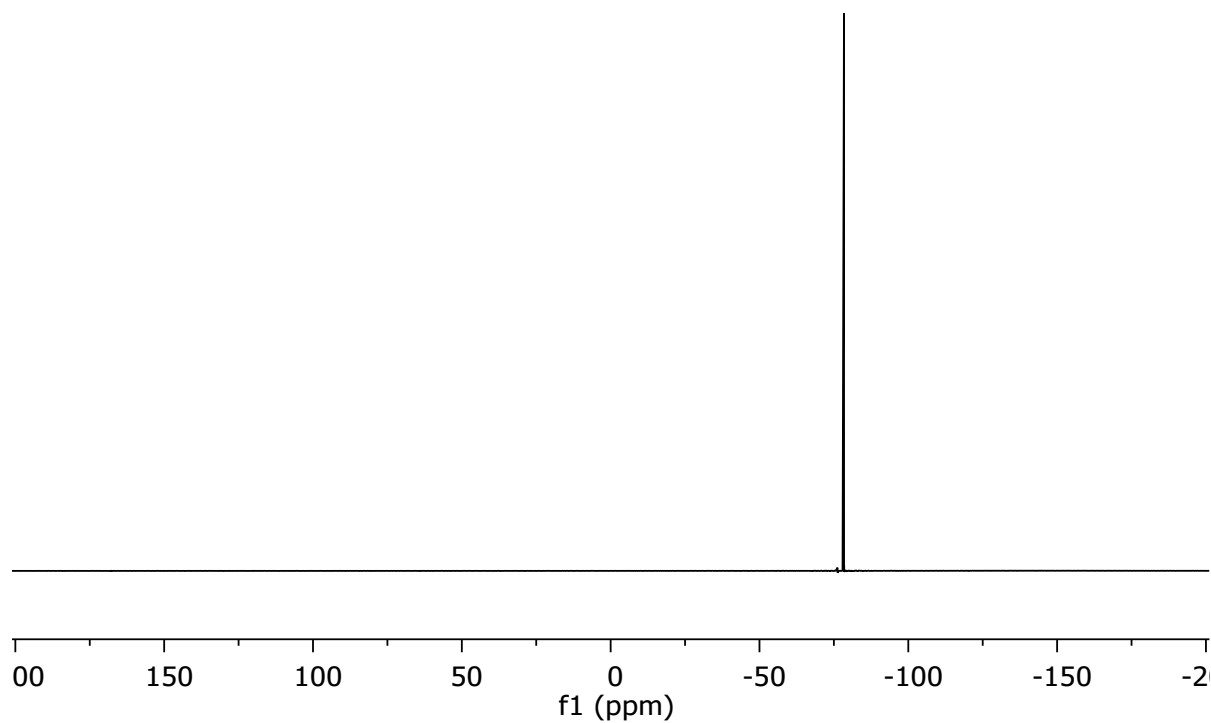

Figure S47:  $^{19}\text{F}$  NMR of **18** in  $\text{CD}_2\text{Cl}_2$

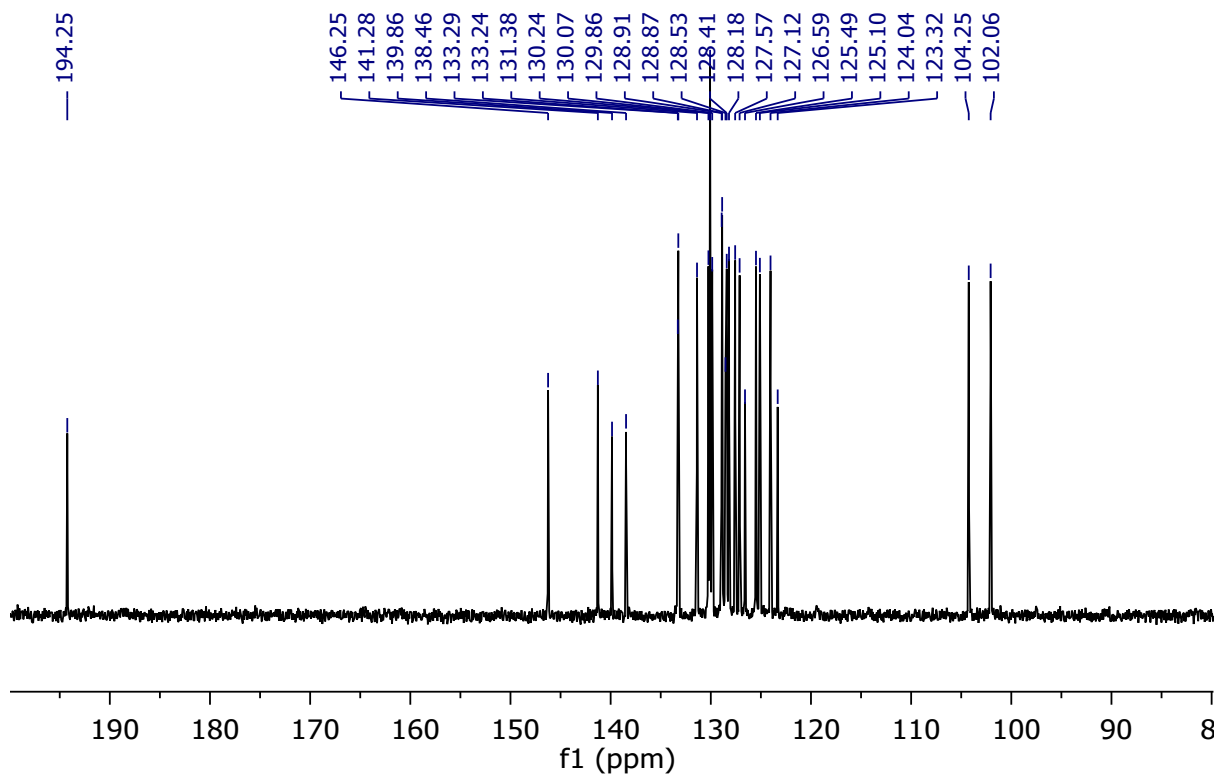

Figure S48:  $^{13}\text{C}$  NMR of **18** in  $\text{CD}_2\text{Cl}_2$

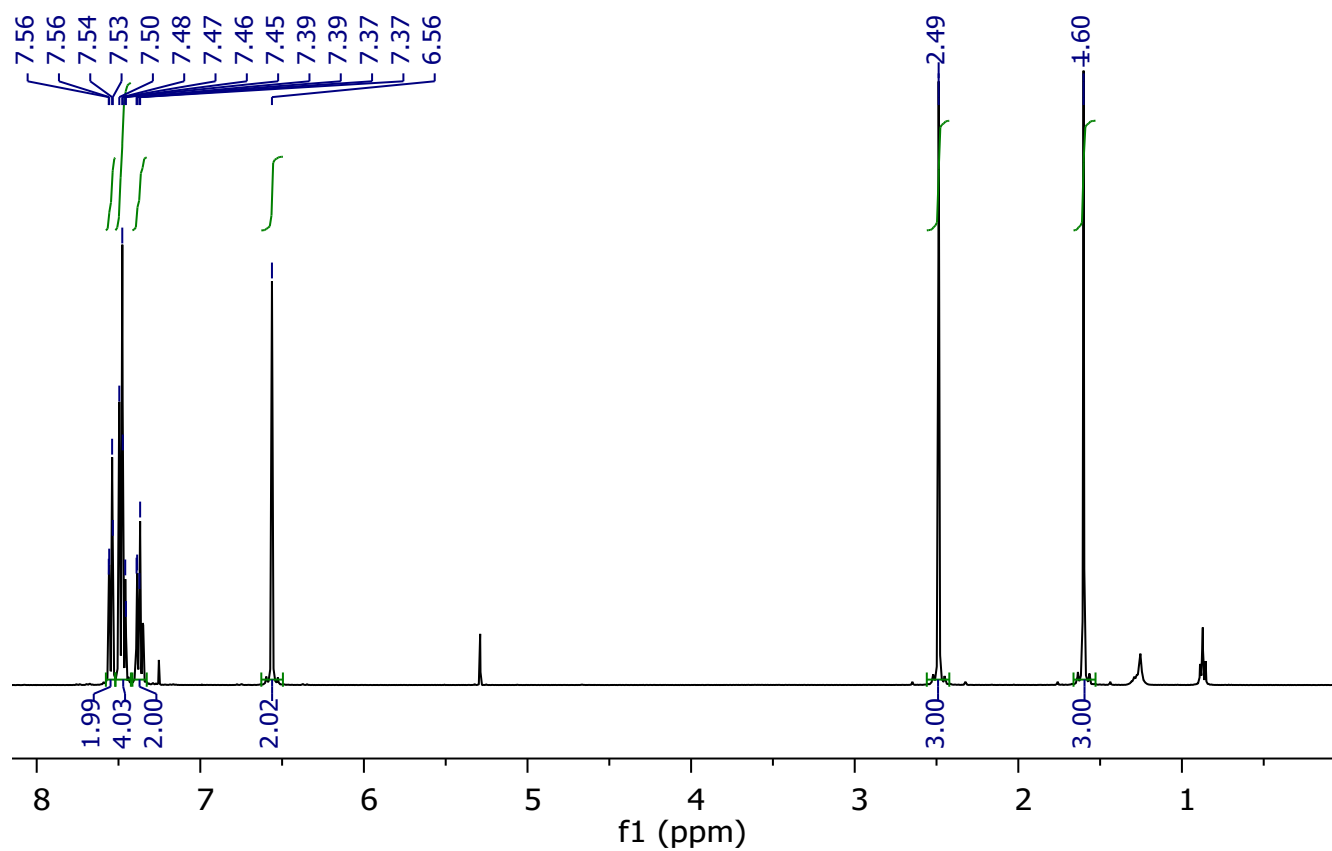

Figure S49:  $^1\text{H}$  NMR of **19** in  $\text{CDCl}_3$

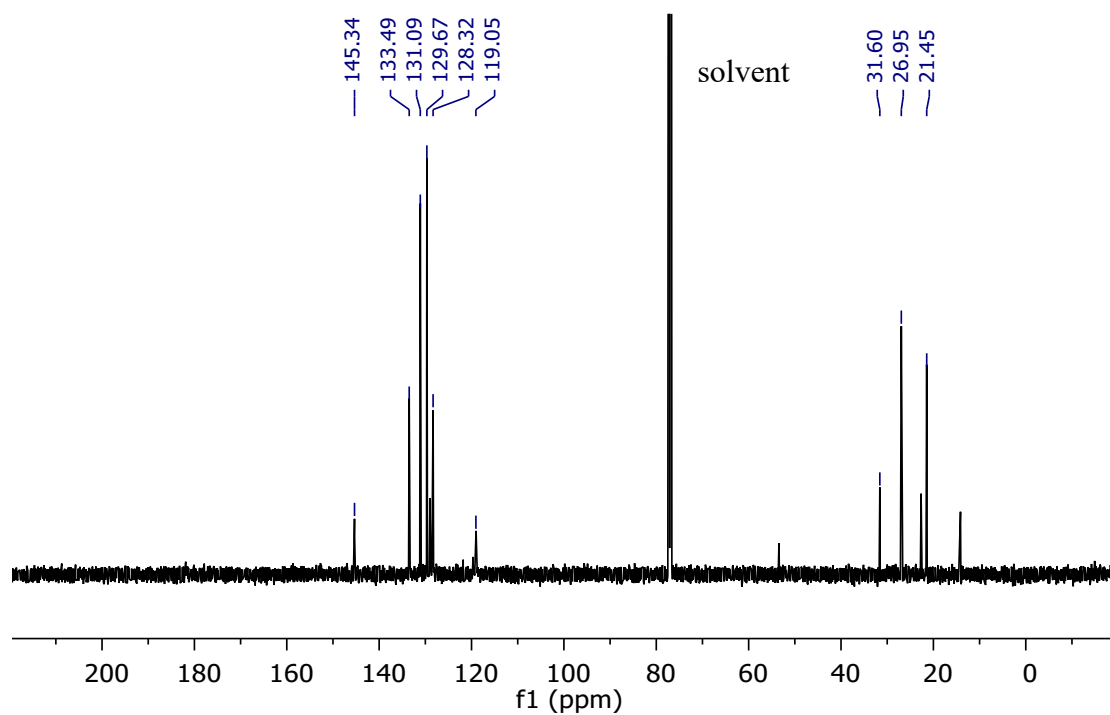

Figure S50:  $^{13}\text{C}$  NMR of **19** in  $\text{CDCl}_3$

## References

---

- <sup>1</sup> a) Rigaku Oxford Diffraction, **2018**, CrysAlisPro Software system, version 1.171.39.46, Rigaku Corporation, Oxford, UK (compounds **15**, **17** and 18); b) Rigaku Oxford Diffraction, **2022**, CrysAlisPro Software system, version 1.171.42.72a, Rigaku Corporation, Oxford, UK (compound **11**).
- <sup>2</sup> APEX3 2018.1, Bruker AXS, Inc. **2018**, Madison WI, U.S.A.
- <sup>3</sup> O. V. Dolomanov, L. J. Bourhis, R.J. Gildea, J. A. K. Howard, H. Puschmann, *J. Appl. Cryst.* **2009**, *42*, 339–341.
- <sup>4</sup> Sheldrick, G. M. A short history of *SHELX*. , *Acta Crystallogr. Section A*, **2008**, *64*, 112-122.
- <sup>5</sup> Sheldrick, G. M. Crystal structure refinement with *SHELXL*. *Acta Crystallogr. Section C*, **2015**, *71*, 3-8.
- <sup>6</sup> S. Parsons, H. D. Flack, T. Wagner, *Acta Crystallogr. Sect. B* **2013**, *69*, 249-259.
